1 **Genome-wide patterns of population structure and linkage**  
2 **disequilibrium in farmed Nile tilapia (*Oreochromis niloticus*)**

3

4 **Running title: Linkage disequilibrium in Nile tilapia**

5

6 Grazyella M. Yoshida<sup>1,2</sup>, Agustín Barria<sup>1</sup>, Katharina Correa<sup>2</sup>, Giovanna Cáceres<sup>1</sup>, Ana  
7 Jedlicki<sup>1</sup>, María I. Cadiz<sup>1</sup>, Jean P. Lhorente<sup>2</sup>, José M. Yáñez<sup>1,2,3\*</sup>

8

9 <sup>1</sup> Facultad de Ciencias Veterinarias y Pecuarias, Universidad de Chile, Santiago, Chile

10 <sup>2</sup> Benchmark Genetics Chile, Puerto Montt, Chile

11 <sup>3</sup> Nucleo Milenio INVASAL, Concepción, Chile

12

13 \*Correspondence:

14 Dr. José Manuel Yáñez

15 [jmayanez@uchile.cl](mailto:jmayanez@uchile.cl)

16

17 Word count: 4,227

18 Number of Figures: 5

19

20

21

22

23

24 **Abstract**

25 Nile tilapia (*Oreochromis niloticus*) is one of the most produced farmed fish in the  
26 world and represents an important source of protein for human consumption. Farmed  
27 Nile tilapia populations are increasingly based on genetically improved stocks, which  
28 have been established from admixed populations. To date, there is scarce information  
29 about the population genomics of farmed Nile tilapia, assessed by dense single  
30 nucleotide polymorphism (SNP) panels. The patterns of linkage disequilibrium (LD)  
31 may affect the success of genome-wide association studies (GWAS) and genomic  
32 selection and can also provide key information about demographic history of farmed  
33 Nile tilapia populations. The objectives of this study were to provide further knowledge  
34 about the population structure and LD patterns, as well as, estimate the effective  
35 population size ( $N_e$ ) for three farmed Nile tilapia populations, one from Brazil (POP A)  
36 and two from Costa Rica (POP B and POP C). A total of 55, 56 and 57 individuals from  
37 POP A, POP B and POP C, respectively, were genotyped using a 50K SNP panel  
38 selected from a whole-genome sequencing (WGS) experiment. Two principal  
39 components explained about 20% of the total variation and clearly discriminated  
40 between the three populations. Population genetic structure analysis showed evidence of  
41 admixture, especially for POP C. The contemporary  $N_e$  values calculated based to LD  
42 values, ranged from 71 to 141. No differences were observed in the LD decay among  
43 populations, with a rapid decrease of  $r^2$  when increasing inter-marker distance. Average  
44  $r^2$  between adjacent SNP pairs ranged from 0.03 to 0.18, 0.03 to 0.17 and 0.03 to 0.16  
45 for POP A, POP B and POP C, respectively. Based on the number of independent  
46 chromosome segments in the Nile tilapia genome, at least 4.2 K SNP are required for  
47 the implementation of GWAS and genomic selection in farmed Nile tilapia populations.

48 **Keywords:** effective population size, genomic prediction, GWAS, *Oreochromis*

49 *niloticus*, population structure

50

51

52

53

54

55

56

57

58

59

60

61

62

63

64

65

66

## 67 **Introduction**

68 Nile tilapia (*Oreochromis niloticus*) is one of most important farmed fish species  
69 worldwide. Breeding programs established since the 1990's have played a key role in  
70 improving commercially important traits and expanding Nile tilapia farming. The  
71 Genetically Improved Farmed Tilapia (GIFT) is the most widespread tilapia breeding  
72 strain (Lim and Webster, 2006), which has been introduced to several countries in Asia,  
73 Africa and Latin America (Gupta and Acosta, 2004). The genetic base of GIFT was  
74 established from eight African and Asian populations, and after six generations of  
75 selection, the genetic gains ranged from 10 to 15% per generation for growth-related  
76 traits (Ponzoni et al., 2011), providing evidence that selective breeding using phenotype  
77 and pedigree information can achieve high and constant genetic gains (Gjedrem and  
78 Rye, 2018).

79 The recent development of single nucleotide polymorphism (SNP) panels for tilapia  
80 (Joshi et al., 2018; Yáñez et al., submitted) will provide new opportunities for  
81 uncovering the genetic basis of relevant traits through GWAS and improving traits that  
82 are difficult or expensive to measure in selection candidates (e.g. fillet yield and  
83 diseases resistance) by the use of genomic selection (Meuwissen et al., 2001). As has  
84 been demonstrated for different traits in salmonid species, the incorporation of genomic  
85 prediction into breeding programs is expected to increase the accuracy of breeding value  
86 predictions, compared to pedigree-based methods (Bangera et al., 2017; Barria et al.,  
87 2018b; Correa et al., 2017; Sae-Lim et al., 2017; Tsai et al., 2016; Vallejo et al., 2018;  
88 Yoshida et al., 2017, 2018).

89 Genomic studies exploit the linkage disequilibrium (LD) between SNP and quantitative  
90 trait locus (QTL) or causative mutation. Thus knowing the extent and decay of LD

91 within a population is important to determine the number of markers that are required  
92 for successful association mapping and genomic selection (Brito et al., 2015; de Roos et  
93 al., 2008; Khatkar et al., 2008; Porto-Neto et al., 2014). To achieve a low LD level  
94 requires a higher marker density to enable markers to capture most of the genetic  
95 variation in a population (Khatkar et al., 2008). The demographic history of farmed fish  
96 populations is one of factors that can affect the extent and decay of LD, which in turn  
97 may affect the success of GWAS and genomic prediction. In addition, LD patterns  
98 provide relevant information about past demographic events including response to both  
99 natural and artificial selection (Slatkin, 2008). The LD throughout the genome, besides  
100 reflecting the population history, provides insight about the breeding system and pattern  
101 of geographic subdivision, which can be explored to study the degree of diversity in  
102 different populations.

103 To date, the most widely used measures of LD between two loci are  $r^2$  and Lewontin's  
104  $D'$  (commonly named  $D'$ ). Values lower than 1 for  $D'$  indicate loci separation due to  
105 recombination, while  $D' = 1$  indicates complete LD between loci, i.e. no recombination.  
106 However, this parameter is highly influenced by allele frequency and sample size. Thus,  
107 high  $D'$  estimations are possible even when loci are in linkage equilibrium (Ardlie et al.,  
108 2002). Therefore, LD measured as the squared correlation ( $r^2$ ) between two loci is  
109 suggested as the most suitable measurement for SNP data (Pritchard and Przeworski,  
110 2001).

111 LD patterns have been widely studied in different livestock species, such as sheep  
112 (Prieur et al., 2017), goats (Mdladla et al., 2016), pigs (Ai et al., 2013), beef (Espigolan  
113 et al., 2013; Porto-Neto et al., 2014) and dairy cattle (Bohmanova et al., 2010). In  
114 aquaculture, recent studies have aimed at characterizing the extent and decay of LD in  
115 farmed species, such as Pacific white shrimp (Jones et al., 2017), Pacific oyster (Zhong

116 et al., 2017), rainbow trout (Rexroad and Vallejo, 2009; Vallejo et al., 2018), coho  
117 salmon (Barria et al., 2018a) and Atlantic salmon (Barria et al., 2018c; Gutierrez et al.,  
118 2015; Hayes et al., 2006; Kijas et al., 2016). However, to date there is scarce  
119 information about population genomic structure and LD in farmed Nile tilapia assessed  
120 by the use of dense SNP panels. For instance, the assessment of LD patterns in Nile  
121 tilapia is still limited to a few studies in which either a small number of markers (14  
122 microsatellites) (Sukmanomon et al., 2012) and individuals (4 to 23 samples) (Hong Xia  
123 et al., 2015) have been used. The objectives of the present study were to (i) estimate the  
124 population structure and genetic differentiation; (ii) assess the genome-wide levels of  
125 LD and (iii) determine the effective population size among three Nile tilapia breeding  
126 populations established in Latin America.

127

## 128 **Methods**

### 129 **Populations**

130 Samples were obtained from three different commercial breeding populations  
131 established in Latin America, originating from admixed stocks imported from Asia and  
132 genetically improved for growth rate for more than 20 generations. Population A (POP  
133 A) was obtained from the AquaAmerica (Brazil) breeding population. This population  
134 was imported from Malaysia in 2005 for breeding and farming purposes, with a genetic  
135 origin from the GIFT strain. POP B and POP C populations were obtained from  
136 Aquacorporación Internacional (Costa Rica). The POP B breeding population is a  
137 mixture of the GIFT strain, POP C and strains from Egypt and Kenya. The POP C  
138 breeding population represents a combination of genetic material from Israel,  
139 Singapore, Taiwan and Thailand from the GIFT strain in the Philippines. Therefore, the

140 three breeding populations are considered recently admixed populations; which are  
141 directly or indirectly related to the GIFT strain and have been artificially selected to  
142 improve growth-related traits. The average relatedness between individuals, within each  
143 population, was estimated using Plink v1.90 (Purcell et al., 2007).

144

## 145 **Genotyping**

146 The genotypes were selected from a whole-genome sequencing experiment aimed at  
147 designing a 50K SNP Illumina BeadChip, which is described in detail in Yáñez et al.  
148 (submitted). Briefly, a total of 59, 126 and 141 individuals were fin-clip sampled for  
149 POP A, POP B and POP C, respectively. Genomic DNA was purified from all the  
150 samples using the DNeasy Blood & Tissue Kit (QIAGEN) according to the  
151 manufacturer's protocol. Whole-genome sequencing was performed using multiplexing  
152 of four bar-coded samples per lane of 100bp paired-end in the Illumina HiSeq 2500  
153 machine. The sequences were trimmed and aligned against the genome assembly  
154 *O\_niloticus\_UMD1* (Conte et al., 2017). About 36 million polymorphic sites were  
155 discovered after variant calling using the Genome Analysis Toolkit GATK (McKenna et  
156 al., 2010). A list of 50K SNP were selected based on quality of genotype and site,  
157 number of missing values, minor allele frequency (MAF), unique position in the  
158 genome and even distribution across the genome as described by Yáñez et al  
159 (submitted). Furthermore, genotype quality control (QC) was performed within each  
160 population excluding SNPs with MAF lower than 5%, Hardy-Weinberg Equilibrium P-  
161 value  $< 1e-06$ , and missing genotype higher than 70%. Animals with a genotype call  
162 rate below 95% were discarded. Afterwards, to use a similar sample size among  
163 populations, animals from POP B and POP C with high identical by descent (IBD) were

164 excluded. The SNP markers used in the subsequent analyses are those common among  
165 the three populations after QC.

166

### 167 **Population structure**

168 We used the software Plink v1.09 (Purcell et al., 2007) to calculate the heterozygosity  
169 observed ( $H_o$ ) and expected ( $H_e$ ) for the three populations and for genetic differentiation  
170 through principal component analysis (PCA). The results of the first two PCAs were  
171 plotted along two axes using R scripts (R Core Team, 2016). Additionally, the  
172 population structure was examined using a hierarchical Bayesian model implemented in  
173 STRUCTURE software v.2.3.4 (Pritchard et al., 2000). We used three replicates of K  
174 value ranging from 1 to 10, a burn-in of 20,000 iterations and running of 50,000. To  
175 choose the best K value we computed the posterior probability of each K as suggested  
176 by Pritchard et al., (2000).

177

### 178 **Estimation of linkage disequilibrium and effective population size**

179 We used the Pearson's squared correlation coefficient ( $r^2$ ) to estimate the LD between  
180 each pair of markers separated by an inter-marker distance between 0 and 10 Mb for  
181 each population. We used Plink v1.09 (Purcell et al., 2007) using the parameters --ld-  
182 window-kb 10000 and --ld-window-r2 set to zero to calculate the LD between all pairs  
183 of SNPs on each chromosome. The extent and decay of the LD, for each population,  
184 were visualized by plotting moving average LD window of 10 Mb along inter-marker  
185 distances.



186 We used the software SNeP v1.1 (Barbato et al., 2015) to estimate the historical  
187 effective population size ( $N_e$ ). Considering the LD within each population,  $N_e$  was  
188 estimated using the following equation proposed by Corbin et al., (2012):

$$189 \quad N_{et} = \frac{1}{(4f(c_t))} \left( \frac{1}{E[r_{adj}^2|c_t]} - \alpha \right)$$

190 where  $N_{et}$  is the effective population size  $t$  generations ago,  $c_t$  represents the  
191 recombination rate  $t$  generations ago, which is proportional to the physical distance  
192 between SNP pair markers,  $r_{adj}^2$  is the estimated LD corrected for sample size and  $\alpha$  is  
193 the adjustment for mutation rate ( $\alpha = 2$ , indicate the presence of mutation). We grouped  
194 the data in 30 distance bins of 50 Kb each. Based on the relatively small number of SNP  
195 per chromosome,  $N_e$  per chromosome was calculated using harmonic mean (Alvarenga  
196 et al., 2018). Using the LD method, we calculated the contemporary population size  
197 using the software NeEstimator v2.01 (Do et al., 2014), using a non-random mating  
198 model and a critical value ( $P_{crit}$ ) of 0.05.

199

## 200 **Results**

### 201 **Quality control**

202 Out of the initial 50K SNP, a total of 31,176 markers were shared among the three  
203 populations after QC criteria. The  $MAF < 0.05$  excluded the higher number of SNPs (~  
204 9.7K on average). After QC, all three populations showed a similar mean MAF value of  
205  $0.26 \pm 0.13$ . The proportion of SNPs for each MAF class was very similar among the  
206 populations (**Figure 1**). The lower (~ 0.15) and higher (~ 0.25) proportion of SNP were  
207 observed in the MAF classes ranging from 0.05 to 0.09 and 0.10 to 0.19, respectively.  
208 To conduct downstream analysis, we used 55, 56 and 57 animals for POP A, POP B and

209 POP C, respectively. These individuals represent the animals with the lowest levels of  
210 IBD, among all sequenced animals, within each population. Average relatedness among  
211 the selected individuals was equal to zero within populations.

212

### 213 **Population structure**

214 Upon plotting the first two eigenvectors on the PCA plot, the three populations were  
215 stratified based on the single dimensional variation between them. The first two  
216 principal components together accounted for 20.0% of the genetic variation, clearly  
217 revealing the three different populations (**Figure 2**). PCA1 discriminates between  
218 populations from Brazil and Costa Rica and accounted for 11.3% of the total genetic  
219 variation. The second principal component explains 8.7% of the total variance and  
220 separated the two populations from Costa Rica into two different clusters. To assess the  
221 genetic diversity among populations, we calculated the observed/expected  
222 heterozygosity ratio ( $H_o/H_e$ ). We found values of 0.23/0.37, 0.26/0.35 and 0.24/0.35 for  
223 POP A, POP B and POP C respectively.

224 In the admixture analysis, by computing the posterior probabilities of each K, the best  
225 result was  $K = 9$ . Different genomic clustering levels and a high level of admixture was  
226 observed for the three populations studied. POP B and POP C showed higher similarity  
227 between each other, than with POP A. For all populations some individuals contained a  
228 level of genetic variation from another population; however, POP B shared a high  
229 proportion ( $>0.25$ ) of one subpopulation common to POP A (red color) and POP B  
230 (orange color) (**Figure 3**). STRUCTURE results evaluating K values from 2 to 10 are  
231 presented in **Supplementary File 1**.

232

## 233 **Estimation of linkage disequilibrium and effective population size**

234 The overall mean LD between marker pairs measured by  $r^2$  was 0.06 for both POP A  
235 and POP C, and slightly lower (0.05) for POP B (**Table 1**). In general, the average LD  
236 among chromosomes ranged from 0.04 to 0.08 for all populations (**Table 1**). From one  
237 to 10,000 Kb, the average of  $r^2$  decreased with increasing physical distance between  
238 markers, from 0.18 to 0.03, 0.17 to 0.03 and 0.16 to 0.03 for POP A, POP B and POP C,  
239 respectively. In addition, the average LD decayed to less than 0.05 within 4 Mb (**Figure**  
240 **4**), and this rate of decrease was very similar across all of the chromosomes for the three  
241 populations (**Supplementary File 2 to 4**).

242 **Figure 5** shows the historical  $N_e$  up to 1500 (A) and up to 120 (B) generations ago,  
243 respectively. The  $N_e$  values were lower in the recent past than the distant past. These  
244 values calculated at five generations ago were 80, 83 and 73 for POP A, POP B and  
245 POP C, respectively. The harmonic means for  $N_e$  at five to 1,500 generations ago was  
246 169, 179 and 166 for POP A, POP B and POP C, respectively. In addition, the  $N_e$  varied  
247 among chromosomes, ranging from 119 to 239 (**Table 1**). Contemporary  $N_e$  calculated  
248 based on LD values were 141, 114 and 71 for POP A, POP B and POP C, respectively.

249

## 250 **Discussion**

### 251 **Genomic population structure**

252 In the PCA, the first two principal components explained about 20% of the total genetic  
253 variation for the populations studied and clearly revealed three different clusters,  
254 corresponding to the three populations present in the dataset (**Figure 2**). In addition, the  
255 lowest values of  $H_o$  for POP A and POP C suggest a loss of genetic diversity due to  
256 found effect, effective population size, or the sample size used in this study.

257 The admixture results provided evidence of a recent mixture of different strains to  
258 conform highly admixture populations. Although the PCA demonstrates three distinct  
259 populations, the admixture analysis showed that, in fact, the three Nile tilapia  
260 populations studied are related through the common GIFT origin. The genetic  
261 differentiation among populations may have been partly generated by genetic drift or  
262 founder effect events which can have a pronounced effect on allele frequencies  
263 (Allendorf and Phelps, 1980). Furthermore, the three populations have undergone  
264 artificial selection for the improvement of growth-related traits in different geographic  
265 locations exposing the populations to distinct environmental conditions and production  
266 systems (POP A and both POP B and C, in Brazil and Cost Rica, respectively). Previous  
267 studies suggest, the introgression of other tilapia species or strains, such as *O.*  
268 *mossambicus* or the Chitralada strain, into the GIFT stocks (McKinna et al., 2010;  
269 Sukmanomon et al., 2012; Xia et al., 2014).

270

### 271 **Linkage disequilibrium and effective population size**

272 Evaluating the whole-genome LD within populations, may help to understand the  
273 different demographic processes experienced by these populations. These processes  
274 include admixture, mutation, founder effect, inbreeding and selection (Gaut and Long,  
275 2003). This is the first study aimed at estimating the extent and decay of LD in farmed  
276 Nile tilapia populations established in Latin America (specifically, Brazil and Costa  
277 Rica), and artificially selected for growth-related traits. Previously, it has been  
278 suggested that due to high kinship relationships high levels of IBD among samples may  
279 inflate the LD estimate (Gutierrez et al., 2015). Thus, to reduce differences in average  
280  $r^2$ , we selected individuals based on low IBD values. Furthermore, to reduce bias

281 sampling effect, we used a similar number of animals from each population. Another  
282 factor that may influence the LD estimate is MAF distributions (Espigolan et al., 2013).  
283 High frequency alleles result in less biased LD estimations. In the present study a small  
284 proportion of SNP (<15%) have MAF lower than 0.10 and low IBD values indicating an  
285 accurate estimation of LD. We used the squared correlation of allele frequencies as a  
286 measure of LD instead of  $|D'|$  to avoid overestimations of LD due the small sample size  
287 (Khatkar et al., 2008). The number of animals to estimate the LD accurately depends on  
288 the demographic and population history. POP A, POP B and POP C each had >55  
289 individuals as suggested by Bohmanova et al., (2010) and Khatkar et al., (2008).

290 We observed on chromosome LG13 and LG19, a pool of  $r^2$  values >0.40 for pair-wise  
291 SNP at large distances (>7 Mb; Supplementary File 2-4), but a LD decline when  
292 physical distance between markers increases is expected. Incorrect position of SNPs  
293 on the reference genome or errors in the reference genome assembly may be resulted in  
294 errors in the estimates. Our study revealed that the LD level declined to 0.05 at 4000 Kb  
295 inter-marker distance and that decay patterns were similar between populations (**Figure**  
296 **4**). A previous study conducted by Hong Xia et al., (2015) reported similar LD patterns  
297 for GIFT tilapia stocks collected from South Africa, Singapore and China. Using  
298 microsatellite loci Sukmanomon et al., (2012) estimated LD means in terms of  
299 disequilibrium coefficient ( $D'$ ) of 0.05 for a GIFT population originally from the  
300 Philippines.

301 Although most of the time, differences between genomes, the quality control applied  
302 and population structure make LD comparison of different species inappropriate, here  
303 we used references from other farmed fish species because of the limited information  
304 that exists for this kind of study in tilapia. Thus, the Nile tilapia populations seems to  
305 present smaller levels of LD than other farmed fish populations (Barria et al., 2018b;

306 Barria et al. 2018c; Gutierrez et al., 2015; Kijas et al., 2016; Vallejo et al., 2018). A  
307 likely explanation is due the diverse origin of the studied Nile tilapia populations, as  
308 was suggested for a Chilean farmed Atlantic salmon population with Norgewian origin  
309 (Barria et al. 2018c). In salmonids, some suggest admixture is a major factor  
310 contributing to long-range LD (Barria et al., 2018c; Ødegård et al., 2014; Vallejo et al.,  
311 2018). Our admixture results suggested, as expected, high evidences that the Nile tilapia  
312 populations have recent history of admixture with wild stocks or different strains, but  
313 not resulted in long-range LD.

314 For Nile tilapia, the effective population size could be the primary cause for the LD  
315 values in POP A, POP B and POP C. LD at a short distance is a function of effective  
316 population size many generations ago and LD at long distances reflect the recent  
317 population history. The LD estimation for POP A resulted in slightly different values at  
318 small distance compared to POP B and POP C, whereas at large distance the differences  
319 were more evident for POP C (**Figure 4**). These results were reflected in smaller  $N_e$  of  
320 many generations ago for POP A and smaller  $N_e$  in the recent past for POP C (**Figure**  
321 **8**). However, the continuous reduction in the  $N_e$ , regardless of population, was observed  
322 over the previous 1,500 generations (**Figure 5A**). The reduction of  $N_e$  can be considered  
323 an indicator of selection and has been suggested to be an important cause of LD  
324 (Pritchard and Przeworski, 2001) and the three populations in this study have been  
325 under genetic selection for some generations. Previously, similar values of  $N_e$  were  
326 estimated using pedigree information from a GIFT population from Malaysia ( $N_e = 88$ )  
327 and from Brazil ( $N_e = 95$ ) (Ponzoni et al., 2010; Yoshida et al., submitted). Some  
328 suggest keeping  $N_e$  values ranging from 50 to 200 to ensure genetic variability in a long-  
329 term breeding population (Bijma, 2000; Smitherman and Tave, 1987). In contrast, a

330 smaller  $N_e$  was found for for rainbow trout (Vallejo et al., 2018) and Atlantic salmon  
331 from North America, Europe (Barria et al., 2018c) and Tasmania (Kijas et al., 2016).

332 In summary, within tilapia populations, the LD values were very low even in short  
333 distances ( $r^2 = 0.15$  for markers spaced at 20-80 Kb). Similar values were found in  
334 humans (Ardlie et al., 2002; Reich et al., 2001), coho salmon (Barria et al., 2018a),  
335 some breeds of cattle (de Roos et al., 2008; Khatkar et al., 2008; Yurchenko et al.,  
336 2018), sheep (Alvarenga et al., 2018) and goats (Brito et al., 2015). Therefore, our LD  
337 results have several implications for future implementation of genomic tools in Nile  
338 tilapia. Both GWAS and genomic selection are dependent on LD extent to define the  
339 number of SNPs necessary to assure the causative mutation variance (Flint-Garcia et al.,  
340 2003) and to achieve a certain accuracy of genomic estimated breeding value  
341 (Meuwissen et al., 2001). Meuwissen (2009) suggested that to achieve accuracies of  
342 genomic breeding (GEBV) ranging from 0.88 to 0.93 using unrelated individuals; it is  
343 necessary to have  $2N_eL$  number of individuals and  $10N_eL$  number of markers, where  $L$   
344 is the length of genome in Morgans. In our study, the contemporary  $N_e$  is 141, 114 and  
345 71 for POP A, POP B and POP C, respectively, and the length of the genome is 14.8  
346 Morgans (Conte et al., 2018). Thus the 11,000 to 21,000 markers are required for Nile  
347 tilapia populations. In contrast, Goddard (2009) suggested that accuracy of genomic  
348 prediction is highly dependent on the effective number of chromosome segments  
349 ( $M_e = 4N_eL$ ). Having a number of independent, biallelic and additive QTL affecting the  
350 trait means we would need a smaller number of markers to achieve a high accuracy.  
351 Thus, the minimum number of markers for a high power genomic analysis should be at  
352 least, 8,300, 6,700 and 4,200 for POP A, POP B and POP C, respectively; numbers  
353 slightly lower than those suggested by Vallejo et al. (2018) and Barria et al. (2018a) for  
354 rainbow trout and coho salmon, respectively, using the same approach.

355 When the genome is sufficiently saturated with markers, the accuracy of GEBV may  
356 also depend on other factors such as the number of individuals genotyped and  
357 phenotyped in the training population and the heritability and number of loci affecting  
358 the trait (Daetwyler et al., 2008; Goddard, 2009). In preliminary studies of genomic  
359 prediction for Nile tilapia, we found high accuracies of GEBV (results not show) for  
360 complex traits, using a similar number of markers but a smaller number of animals  
361 suggested by Meuwissen (2009). However, this is our first genomic prediction analysis  
362 and we have still to test other experimental designs, marker density and methods to  
363 confirm the relationship between the number of markers and accuracy of GEBV. Once  
364 completed, it will be possible to cost-effectively include genomic information in Nile  
365 tilapia breeding programs.

366

## 367 **Conclusions**

368 The current study revealed similar short-range LD decay for three farmed Nile tilapia  
369 populations. The PCA suggested three distinct populations, whereas the admixture  
370 analysis confirmed that these three populations are highly admixed and are directly or  
371 indirectly related to the same GIFT strain origin. Based on the number of independent  
372 chromosome segments, at least 4.2 K SNPs might be required to implement GWAS and  
373 genomic prediction in the current Nile tilapia populations.

374

## 375 **Ethics approval and consent to participate**

376 Nile tilapia sampling procedures is in process of approving by the Comité de Bioética  
377 Animal from the Facultad de Ciencias Veterinarias y Pecuarias, Universidad de Chile.



378

379 **Consent for publication**

380 Not applicable

381

382 **Availability of data and material**

383 For each each population, raw genotype data is available on the online digital repository

384 Figshare, accession number 10.6084/m9.figshare.7581581.

385

386 **Conflict of Interest Statement**

387 The authors declare that the research was conducted in the absence of any commercial

388 or financial relationships that could be construed as a potential conflict of interest

389

390 **Funding**

391 This work has been funded by Corfo (project number 14EIAT-28667).

392

393 **Authors' contributions**

394 GMY performed the analysis and wrote the initial version of the manuscript. AB

395 contribute with discussion and writing. GC, MC and AJ performed DNA extraction. KC

396 and JPL contributed with study design. JMY conceived and designed the study;

397 contributed to the analysis, discussion and writing. All authors have reviewed and  
398 approved the manuscript.

399

#### 400 **Acknowledgements**

401 The authors are grateful to Aquacorporación Internacional and AquaAmerica for  
402 providing the Nile tilapia samples. We would like to thank to José Soto and Diego Salas  
403 from Aquacorporación International and Natalí Kunita and Gabriel Rizzato from  
404 AquaAmerica for their kind contribution with tilapia samples from Costa Rica and  
405 Brazil, respectively.

406

## References

- Ai, H., Huang, L., and Ren, J. (2013). Genetic Diversity, Linkage Disequilibrium and Selection Signatures in Chinese and Western Pigs Revealed by Genome-Wide SNP Markers. *PLoS One* 8, e56001. doi:10.1371/journal.pone.0056001.
- Allendorf, F. W., and Phelps, S. R. (1980). Loss of Genetic Variation in a Hatchery Stock of Cutthroat Trout. *Trans. Am. Fish. Soc.* 109, 537–543. doi:10.1577/1548-8659(1980)109<537:LOGVIA>2.0.CO;2.
- Alvarenga, A. B., Rovadoscki, G. A., Petrini, J., Coutinho, L. L., Morota, G., Spangler, M. L., et al. (2018). Linkage disequilibrium in Brazilian Santa Inês breed, Ovis aries. *Sci. Rep.* 8, 8851. doi:10.1038/s41598-018-27259-7.
- Ardlie, K. G., Kruglyak, L., and Seielstad, M. (2002). Patterns of Linkage Disequilibrium in the Human Genome. *Nat. Rev. Genet.* 3.
- Bangera, R., Correa, K., Lhorente, J. P., Figueroa, R., and Yáñez, J. M. (2017). Genomic predictions can accelerate selection for resistance against *Piscirickettsia salmonis* in Atlantic salmon (*Salmo salar*). *BMC Genomics* 18, 121. doi:10.1186/s12864-017-3487-y.
- Barbato, M., Orozco-terWengel, P., Tapio, M., and Bruford, M. W. (2015). SNeP: a tool to estimate trends in recent effective population size trajectories using genome-wide SNP data. *Front. Genet.* 6, 109. doi:10.3389/fgene.2015.00109.
- Barria, A., Christensen, K. A., Yoshida, G., Jedlicki, A. M., Lhorente, J. P., Davidson, W. S., et al. (2018a). Whole genome linkage disequilibrium and effective population size in a coho salmon (*Oncorhynchus kisutch*) breeding population. *bioRxiv*, 335018. doi:10.1101/335018.
- Barria, A., Christensen, K. A., Yoshida, G. M., Correa, K., Jedlicki, A., Lhorente, J. P., et al. (2018b). Genomic Predictions and Genome-Wide Association Study of Resistance Against *Piscirickettsia salmonis* in Coho Salmon (*Oncorhynchus kisutch*) Using ddRAD Sequencing. *G3 Genes/Genomes/Genetics* 8, 1183–1194. doi:10.1534/g3.118.200053.
- Barria, A., Lopez, M. E., Yoshida, G., Cavalheiro, R., and Yanez, J. M. (2018c). Population genomic structure and genome-wide linkage disequilibrium in farmed Atlantic salmon (*Salmo salar* L.) using dense SNP genotypes. *Front. Genet.* 9, 649. doi:10.3389/fgene.2018.00649.
- Bijma, P. (2000). Long-term genetic contributions: prediction of rates of inbreeding and genetic gain in selected populations. *Long-term Genet. Contrib. Predict. rates*

- inbreeding Genet. gain Sel. Popul.* Available at: <https://www.cabdirect.org/cabdirect/abstract/20000109374> [Accessed July 31, 2017].
- Bohmanova, J., Sargolzaei, M., and Schenkel, F. S. (2010). Characteristics of linkage disequilibrium in North American Holsteins. *BMC Genomics* 11, 421. doi:10.1186/1471-2164-11-421.
- Brito, L. F., Jafarikia, M., Grossi, D. A., Kijas, J. W., Porto-Neto, L. R., Ventura, R. V., et al. (2015). Characterization of linkage disequilibrium, consistency of gametic phase and admixture in Australian and Canadian goats. *BMC Genet.* 16, 67. doi:10.1186/s12863-015-0220-1.
- Conte, M. A., Gammerdinger, W. J., Bartie, K. L., Penman, D. J., and Kocher, T. D. (2017). A high quality assembly of the Nile Tilapia (*Oreochromis niloticus*) genome reveals the structure of two sex determination regions. *BMC Genomics* 18, 341. doi:10.1186/s12864-017-3723-5.
- Conte, M. A., Joshi, R., Moore, E. C., Nandamuri, S. P., Gammerdinger, W. J., Roberts, R. B., et al. (2018). Chromosome-scale assemblies reveal the structural evolution of African cichlid genomes. *bioRxiv*, 383992. doi:10.1101/383992.
- Corbin, L. J., Liu, A. Y. H., Bishop, S. C., and Woolliams, J. A. (2012). Estimation of historical effective population size using linkage disequilibria with marker data. *J. Anim. Breed. Genet.* 129, 257–270.
- Correa, K., Bangera, R., Figueroa, R., Lhorente, J. P., and Yáñez, J. M. (2017). The use of genomic information increases the accuracy of breeding value predictions for sea louse (*Caligus rogercresseyi*) resistance in Atlantic salmon (*Salmo salar*). *Genet. Sel. Evol.* 49, 15. doi:10.1186/s12711-017-0291-8.
- Daetwyler, H. D., Villanueva, B., Woolliams, J. A., Schaeffer, L., and Crawford, A. (2008). Accuracy of Predicting the Genetic Risk of Disease Using a Genome-Wide Approach. *PLoS One* 3, e3395. doi:10.1371/journal.pone.0003395.
- de Roos, A. P. W., Hayes, B. J., Spelman, R. J., and Goddard, M. E. (2008). Linkage disequilibrium and persistence of phase in Holstein-Friesian, Jersey and Angus cattle. *Genetics* 179, 1503–12. doi:10.1534/genetics.107.084301.
- Do, C., Waples, R. S., Peel, D., Macbeth, G. M., Tillett, B. J., and Ovenden, J. R. (2014). NeEstimator v2: re-implementation of software for the estimation of contemporary effective population size ( $N_e$ ) from genetic data. *Mol. Ecol. Resour.* 14, 209–214. doi:10.1111/1755-0998.12157.

- Espigolan, R., Baldi, F., Boligon, A. A., Souza, F. R., Gordo, D. G., Tonussi, R. L., et al. (2013). Study of whole genome linkage disequilibrium in Nellore cattle. *BMC Genomics* 14, 305. doi:10.1186/1471-2164-14-305.
- Flint-Garcia, S. A., Thornsberry, J. M., and Buckler, E. S. (2003). Structure of Linkage Disequilibrium in Plants. *Annu. Rev. Plant Biol.* 54, 357–374. doi:10.1146/annurev.arplant.54.031902.134907.
- Gaut, B. S., and Long, A. D. (2003). The lowdown on linkage disequilibrium. *Plant Cell* 15, 1502–6. doi:10.1105/TPC.150730.
- Gjedrem, T., and Rye, M. (2018). Selection response in fish and shellfish: a review. *Rev. Aquac.* 10, 168–179. doi:10.1111/raq.12154.
- Goddard, M. (2009). Genomic selection: prediction of accuracy and maximisation of long term response. *Genetica* 136, 245–257. doi:10.1007/s10709-008-9308-0.
- Gupta, M. V., and Acosta, B. O. (2004). From drawing board to dining table: the success story of the GIFT project. *Naga, Worldfish Cent. Q.* 27, 4–14. Available at: <http://aquaticcommons.org/9223/> [Accessed December 16, 2018].
- Gutierrez, A. P., Yáñez, J. M., Fukui, S., Swift, B., and Davidson, W. S. (2015). Genome-Wide Association Study (GWAS) for Growth Rate and Age at Sexual Maturation in Atlantic Salmon (*Salmo salar*). *PLoS One* 10, e0119730. doi:10.1371/journal.pone.0119730.
- Hayes, B. J., Gjuvland, A., and Omholt, S. (2006). Power of QTL mapping experiments in commercial Atlantic salmon populations, exploiting linkage and linkage disequilibrium and effect of limited recombination in males. *Heredity (Edinb)*. 97, 19–26. doi:10.1038/sj.hdy.6800827.
- Hong Xia, J., Bai, Z., Meng, Z., Zhang, Y., Wang, L., Liu, F., et al. (2015). Signatures of selection in tilapia revealed by whole genome resequencing. *Sci. Rep.* 5, 14168. doi:10.1038/srep14168.
- Jones, D. B., Jerry, D. R., Khatkar, M. S., Raadsma, H. W., Steen, H. van der, Prochaska, J., et al. (2017). A comparative integrated gene-based linkage and locus ordering by linkage disequilibrium map for the Pacific white shrimp, *Litopenaeus vannamei*. *Sci. Rep.* 7, 10360. doi:10.1038/s41598-017-10515-7.
- Joshi, R., Arnyasi, M., Lien, S., Gjoen, H. M., Alvarez, A. T., and Kent, M. (2018). Development and validation of 58K SNP-array and high-density linkage map in Nile tilapia (*O. niloticus*). *bioRxiv*, 322826. doi:10.1101/322826.
- Khatkar, M. S., Nicholas, F. W., Collins, A. R., Zenger, K. R., Cavanagh, J. AL, Barris,

- W., et al. (2008). Extent of genome-wide linkage disequilibrium in Australian Holstein-Friesian cattle based on a high-density SNP panel. *BMC Genomics* 9, 187. doi:10.1186/1471-2164-9-187.
- Kijas, J., Elliot, N., Kube, P., Evans, B., Botwright, N., King, H., et al. (2016). Diversity and linkage disequilibrium in farmed Tasmanian Atlantic salmon. *Anim. Genet.* doi:10.1111/age.12513.
- Lim, C., and Webster, C. D. (2006). *Tilapia: biology, culture, and nutrition*. Food Products Press.
- McKenna, A., Hanna, M., Banks, E., Sivachenko, A., Cibulskis, K., Kernytsky, A., et al. (2010). The Genome Analysis Toolkit: a MapReduce framework for analyzing next-generation DNA sequencing data. *Genome Res.* 20, 1297–303. doi:10.1101/gr.107524.110.
- McKinna, E. M., Nandlal, S., Mather, P. B., and Hurwood, D. A. (2010). An investigation of the possible causes for the loss of productivity in genetically improved farmed tilapia strain in Fiji: inbreeding versus wild stock introgression. *Aquac. Res.* 41, e730–e742. doi:10.1111/j.1365-2109.2010.02539.x.
- Mdladla, K., Dzomba, E. F., Huson, H. J., and Muchadeyi, F. C. (2016). Population genomic structure and linkage disequilibrium analysis of South African goat breeds using genome-wide SNP data. *Anim. Genet.* 47, 471–482. doi:10.1111/age.12442.
- Meuwissen, T. H. (2009). Accuracy of breeding values of “unrelated” individuals predicted by dense SNP genotyping. *Genet. Sel. Evol.* 41, 35. doi:10.1186/1297-9686-41-35.
- Meuwissen, T. H. E., Hayes, B. J., and Goddard, M. E. (2001). Prediction of Total Genetic Value Using Genome-Wide Dense Marker Maps. *Genetics* 157, 1819–1829.
- Ødegård, J., Moen, T., Santi, N., Korsvoll, S. A., Kjøglum, S., and Meuwisse, T. H. E. (2014). Genomic prediction in an admixed population of Atlantic salmon (*Salmo salar*). *Front. Genet.* 5, 1–8. doi:10.3389/fgene.2014.00402.
- Ponzoni, R. W., Khaw, H. L., Nguyen, N. H., and Hamzah, A. (2010). Inbreeding and effective population size in the Malaysian nucleus of the GIFT strain of Nile tilapia (*Oreochromis niloticus*). *Aquaculture* 302, 42–48. doi:10.1016/j.aquaculture.2010.02.009.
- Ponzoni, R. W., Nguyen, N. H., Khaw, H. L., Hamzah, A., Bakar, K. R. A., and Yee, H.

- Y. (2011). Genetic improvement of Nile tilapia (*Oreochromis niloticus*) with special reference to the work conducted by the WorldFish Center with the GIFT strain. *Rev. Aquac.* 3, 27–41. doi:10.1111/j.1753-5131.2010.01041.x.
- Porto-Neto, L. R., Kijas, J. W., and Reverter, A. (2014). The extent of linkage disequilibrium in beef cattle breeds using high-density SNP genotypes. *Genet. Sel. Evol.* 46, 22. doi:10.1186/1297-9686-46-22.
- Prieur, V., Clarke, S. M., Brito, L. F., McEwan, J. C., Lee, M. A., Brauning, R., et al. (2017). Estimation of linkage disequilibrium and effective population size in New Zealand sheep using three different methods to create genetic maps. *BMC Genet.* 18, 68. doi:10.1186/s12863-017-0534-2.
- Pritchard, J. K., and Przeworski, M. (2001). Linkage Disequilibrium in Humans: Models and Data. *Am. J. Hum. Genet.* 69, 1–14. doi:10.1086/321275.
- Pritchard, J. K., Stephens, M., Rosenberg, N. A., and Donnelly, P. (2000). Association Mapping in Structured Populations. *Am. J. Hum. Genet.* 67, 170–181. doi:10.1086/302959.
- Purcell, S., Neale, B., Todd-Brown, K., Thomas, L., Ferreira, M. A. R., Bender, D., et al. (2007). PLINK: A Tool Set for Whole-Genome Association and Population-Based Linkage Analyses. *Am. J. Hum. Genet.* 81, 559–575. doi:10.1086/519795.
- R Core Team (2016). R: A Language and Environment for Statistical Computing; R Foundation for Statistical Computing: Vienna, Austria, 2015.
- Reich, D. E., Cargill, M., Bolk, S., Ireland, J., Sabeti, P. C., Richter, D. J., et al. (2001). Linkage disequilibrium in the human genome. *Nature* 411, 199–204. doi:10.1038/35075590.
- Rexroad, C. E., and Vallejo, R. L. (2009). Estimates of linkage disequilibrium and effective population size in rainbow trout. *BMC Genet.* 10, 83. doi:10.1186/1471-2156-10-83.
- Sae-Lim, P., Kause, A., Lillehammer, M., and Mulder, H. A. (2017). Estimation of breeding values for uniformity of growth in Atlantic salmon (*Salmo salar*) using pedigree relationships or single-step genomic evaluation. *Genet. Sel. Evol.* 49, 33. doi:10.1186/s12711-017-0308-3.
- Slatkin, M. (2008). Linkage disequilibrium — understanding the evolutionary past and mapping the medical future. *Nat. Rev. Genet.* 9, 477–485. doi:10.1038/nrg2361.
- Smitherman, R. O., and Tave, D. (1987). Maintenance of genetic quality in cultured tilapia. *Asian Fish. Sci.* 1, 75–82. Available at: <http://agris.fao.org/agris->

- search/search.do?recordID=PH19920097375 [Accessed August 2, 2017].
- Sukmanomon, S., Kamonrat, W., Poompuang, S., Nguyen, T. T. T., Bartley, D. M., May, B., et al. (2012). Genetic changes, intra- and inter-specific introgression in farmed Nile tilapia (*Oreochromis niloticus*) in Thailand. *Aquaculture* 324–325, 44–54. doi:10.1016/J.AQUACULTURE.2011.10.025.
- Tsai, H.-Y., Hamilton, A., Tinch, A. E., Guy, D. R., Bron, J. E., Taggart, J. B., et al. (2016). Genomic prediction of host resistance to sea lice in farmed Atlantic salmon populations. *Genet. Sel. Evol.* 48, 47. doi:10.1186/s12711-016-0226-9.
- Vallejo, R. L., Silva, R. M. O., Evenhuis, J. P., Gao, G., Sixin, L., Parsons, J. E., et al. (2018). Accurate genomic predictions for BCWD resistance in rainbow trout are achieved using low-density SNP panels : evidence that long-range LD is a major contributing factor. *J. Anim. Breed. Genet.* doi:10.1111/jbg.12335.
- Xia, J. H., Wan, Z. Y., Ng, Z. L., Wang, L., Fu, G. H., Lin, G., et al. (2014). Genome-wide discovery and in silico mapping of gene-associated SNPs in Nile tilapia. *Aquaculture* 432, 67–73. doi:10.1016/J.AQUACULTURE.2014.04.028.
- Yáñez, J. M., Yoshida, G. M., Cáceres, G., Lopez, M. E., Lhorente, J. P., Jedlicki, A. M., et al. High-throughput single nucleotide polymorphism (SNP) discovery and design of a 50K SNP chip for Nile tilapia (*Oreochromis niloticus*) using whole-genome sequencing of hundreds of animals. *Front. Genet.* (Submitted).
- Yoshida, G. M., Bangera, R., Carvalheiro, R., Correa, K., Figueroa, R., Lhorente, J. P., et al. (2017). Genomic Prediction Accuracy for Resistance Against *Piscirickettsia salmonis* in Farmed Rainbow Trout. *G3 Genes/Genomes/Genetics; Genes/Genomes/Genetics*, g3.300499.2017. doi:10.1534/g3.117.300499.
- Yoshida, G. M., Carvalheiro, R., Rodríguez, F. H., Lhorente, J. P., and Yáñez, J. M. (2018). Single-step genomic evaluation improves accuracy of breeding value predictions for resistance to infectious pancreatic necrosis virus in rainbow trout. *Genomics*. doi:10.1016/j.ygeno.2018.01.008.
- Yoshida, G. M., Oliveira, A. M., Oliveira, C. A. L. de, Todesco, H., Bezerra Jr., J., Karin, H., et al. A 10-year breeding program for Nile tilapia in Brazil: selection for increased growth rate in cage farming. *Aquaculture* (Submitted).
- Yurchenko, A., Yudin, N., Aitnazarov, R., Plyusnina, A., Brukhin, V., Soloshenko, V., et al. (2018). Genome-wide genotyping uncovers genetic profiles and history of the Russian cattle breeds. *Heredity (Edinb.)*. 120, 125–137. doi:10.1038/s41437-017-0024-3.



Zhong, X., Li, Q., Kong, L., and Yu, H. (2017). Estimates of Linkage Disequilibrium and Effective Population Size in Wild and Selected Populations of the Pacific Oyster Using Single-nucleotide Polymorphism Markers. *J. World Aquac. Soc.* 48, 791–801. doi:10.1111/jwas.12393.

**Table 1.** Number of SNPs, chromosome linkage group (LG) size, average linkage disequilibrium ( $r^2$ ) and effective population size ( $N_e$ ) for three Nile tilapia farmed populations.

| ONil        | Chromosome     |              | POP A                           |            | POP B                           |            | POP C                           |            |
|-------------|----------------|--------------|---------------------------------|------------|---------------------------------|------------|---------------------------------|------------|
|             | Number of SNPs | Size (Mb)    | $r^2$ mean $\pm$ SD             | $N_e$      | $r^2$ mean $\pm$ SD             | $N_e$      | $r^2$ mean $\pm$ SD             | $N_e$      |
| 01          | 1,386          | 38.26        | 0.05 $\pm$ 0.08                 | 173        | 0.06 $\pm$ 0.09                 | 154        | 0.05 $\pm$ 0.08                 | 174        |
| 02          | 1,186          | 35.09        | 0.07 $\pm$ 0.11                 | 139        | 0.05 $\pm$ 0.08                 | 184        | 0.06 $\pm$ 0.09                 | 159        |
| 03          | 1,617          | 54.17        | 0.04 $\pm$ 0.06                 | 229        | 0.04 $\pm$ 0.06                 | 239        | 0.04 $\pm$ 0.06                 | 214        |
| 04          | 1,313          | 37.93        | 0.05 $\pm$ 0.08                 | 192        | 0.05 $\pm$ 0.07                 | 199        | 0.05 $\pm$ 0.07                 | 186        |
| 05          | 1,219          | 34.51        | 0.05 $\pm$ 0.09                 | 183        | 0.05 $\pm$ 0.09                 | 178        | 0.05 $\pm$ 0.08                 | 179        |
| 06          | 1,522          | 44.55        | 0.06 $\pm$ 0.10                 | 151        | 0.05 $\pm$ 0.08                 | 200        | 0.06 $\pm$ 0.08                 | 156        |
| 07          | 2,558          | 61.88        | 0.06 $\pm$ 0.10                 | 138        | 0.06 $\pm$ 0.10                 | 154        | 0.06 $\pm$ 0.09                 | 151        |
| 08          | 1,273          | 30.74        | 0.06 $\pm$ 0.10                 | 152        | 0.05 $\pm$ 0.09                 | 186        | 0.05 $\pm$ 0.09                 | 185        |
| 09          | 1,036          | 27.47        | 0.05 $\pm$ 0.08                 | 215        | 0.05 $\pm$ 0.08                 | 223        | 0.05 $\pm$ 0.08                 | 200        |
| 10          | 1,272          | 32.35        | 0.05 $\pm$ 0.09                 | 181        | 0.06 $\pm$ 0.09                 | 166        | 0.06 $\pm$ 0.09                 | 161        |
| 11          | 1,330          | 36.27        | 0.05 $\pm$ 0.09                 | 180        | 0.05 $\pm$ 0.08                 | 201        | 0.06 $\pm$ 0.09                 | 156        |
| 12          | 1,492          | 41.13        | 0.05 $\pm$ 0.08                 | 191        | 0.05 $\pm$ 0.09                 | 176        | 0.05 $\pm$ 0.08                 | 168        |
| 13          | 1,137          | 32.25        | 0.06 $\pm$ 0.12                 | 142        | 0.05 $\pm$ 0.09                 | 187        | 0.06 $\pm$ 0.09                 | 162        |
| 14          | 1,544          | 39.18        | 0.05 $\pm$ 0.08                 | 190        | 0.05 $\pm$ 0.09                 | 171        | 0.06 $\pm$ 0.09                 | 142        |
| 15          | 1,213          | 36.09        | 0.06 $\pm$ 0.09                 | 156        | 0.06 $\pm$ 0.09                 | 159        | 0.06 $\pm$ 0.09                 | 145        |
| 16          | 1,715          | 43.61        | 0.06 $\pm$ 0.10                 | 158        | 0.07 $\pm$ 0.11                 | 138        | 0.05 $\pm$ 0.09                 | 176        |
| 17          | 1,409          | 40.58        | 0.06 $\pm$ 0.09                 | 153        | 0.06 $\pm$ 0.09                 | 152        | 0.05 $\pm$ 0.08                 | 168        |
| 18          | 1,363          | 36.96        | 0.06 $\pm$ 0.10                 | 165        | 0.05 $\pm$ 0.09                 | 193        | 0.05 $\pm$ 0.08                 | 183        |
| 19          | 1,202          | 31.16        | 0.08 $\pm$ 0.14                 | 130        | 0.08 $\pm$ 0.14                 | 123        | 0.08 $\pm$ 0.13                 | 119        |
| 20          | 1,457          | 36.56        | 0.06 $\pm$ 0.09                 | 167        | 0.05 $\pm$ 0.08                 | 204        | 0.05 $\pm$ 0.08                 | 176        |
| 22          | 1,518          | 36.92        | 0.05 $\pm$ 0.09                 | 164        | 0.06 $\pm$ 0.09                 | 156        | 0.06 $\pm$ 0.10                 | 145        |
| 23          | 1,414          | 43.89        | 0.05 $\pm$ 0.09                 | 176        | 0.05 $\pm$ 0.08                 | 186        | 0.06 $\pm$ 0.10                 | 143        |
| <b>Mean</b> | <b>1,417</b>   | <b>46.86</b> | <b>0.06<math>\pm</math>0.10</b> | <b>169</b> | <b>0.05<math>\pm</math>0.09</b> | <b>179</b> | <b>0.06<math>\pm</math>0.09</b> | <b>166</b> |

**Figure 1.** Proportion of SNPs for different minor allele frequency for three Nile tilapia populations.

**Figure 2.** Principal component analysis revealing genetic differentiation of three Nile tilapia populations using autosomal genotypic data.

**Figure 3.** Admixture clustering of the three Nile population for  $K = 9$ . The animals are grouped by population and each individual is represented by a vertical bar. The gradient black lines delineate different populations under study.

**Figure 4.** Average linkage disequilibrium ( $r^2$ ) decay by physical distance for three Nile tilapia populations.

**Figure 5.** Effective population size ( $N_e$ ) from 1500 to 5 generations ago (a) and from 120 to 5 generations ago (b) based on linkage disequilibrium for three Nile tilapia populations.

**Supplementary File 1.** Admixture clustering of the three Nile populations for  $K$  values ranging from 2 to 10. The animals are grouped by population and each individual is represented by a vertical bar. The gradient black lines delineate different populations under study.

**Supplementary File 2.** Linkage disequilibrium decay by physical distance estimated by chromosome linkage group (LG) for POP A.

**Supplementary File 3.** Linkage disequilibrium decay by physical distance estimated by chromosome linkage group (LG) for POP B.

**Supplementary File 4.** Linkage disequilibrium decay by physical distance estimated by chromosome linkage group (LG) for POP C.

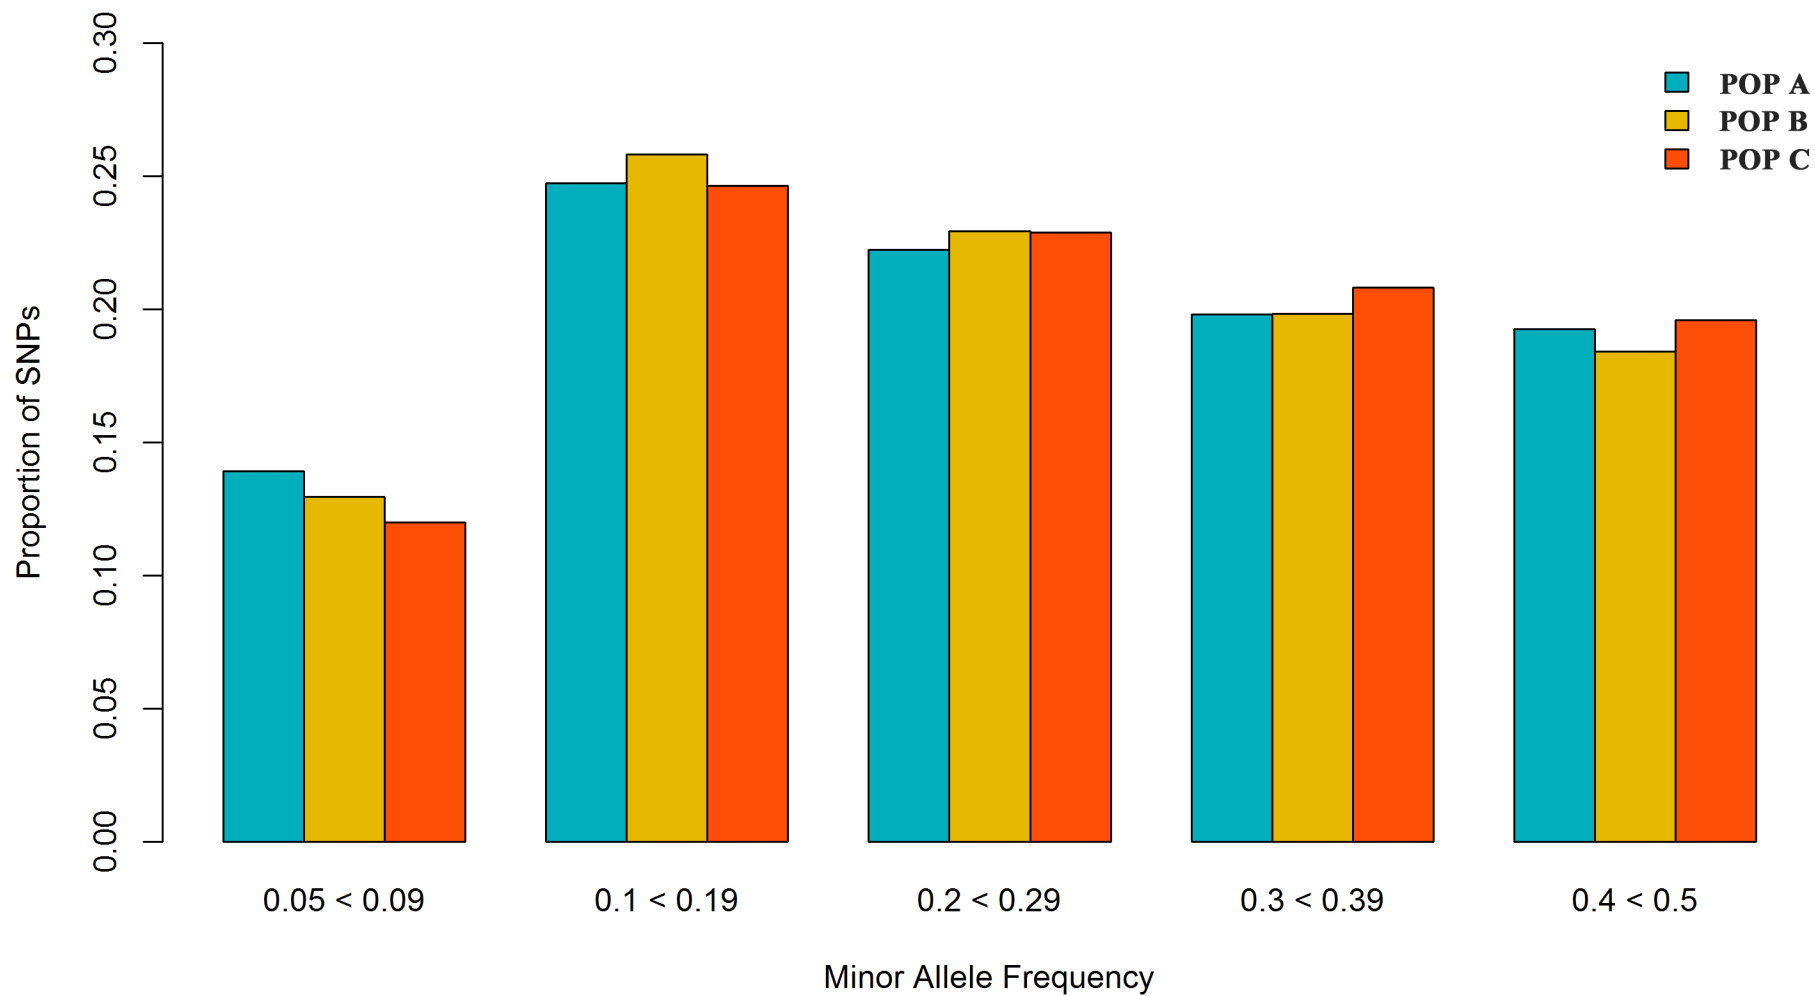

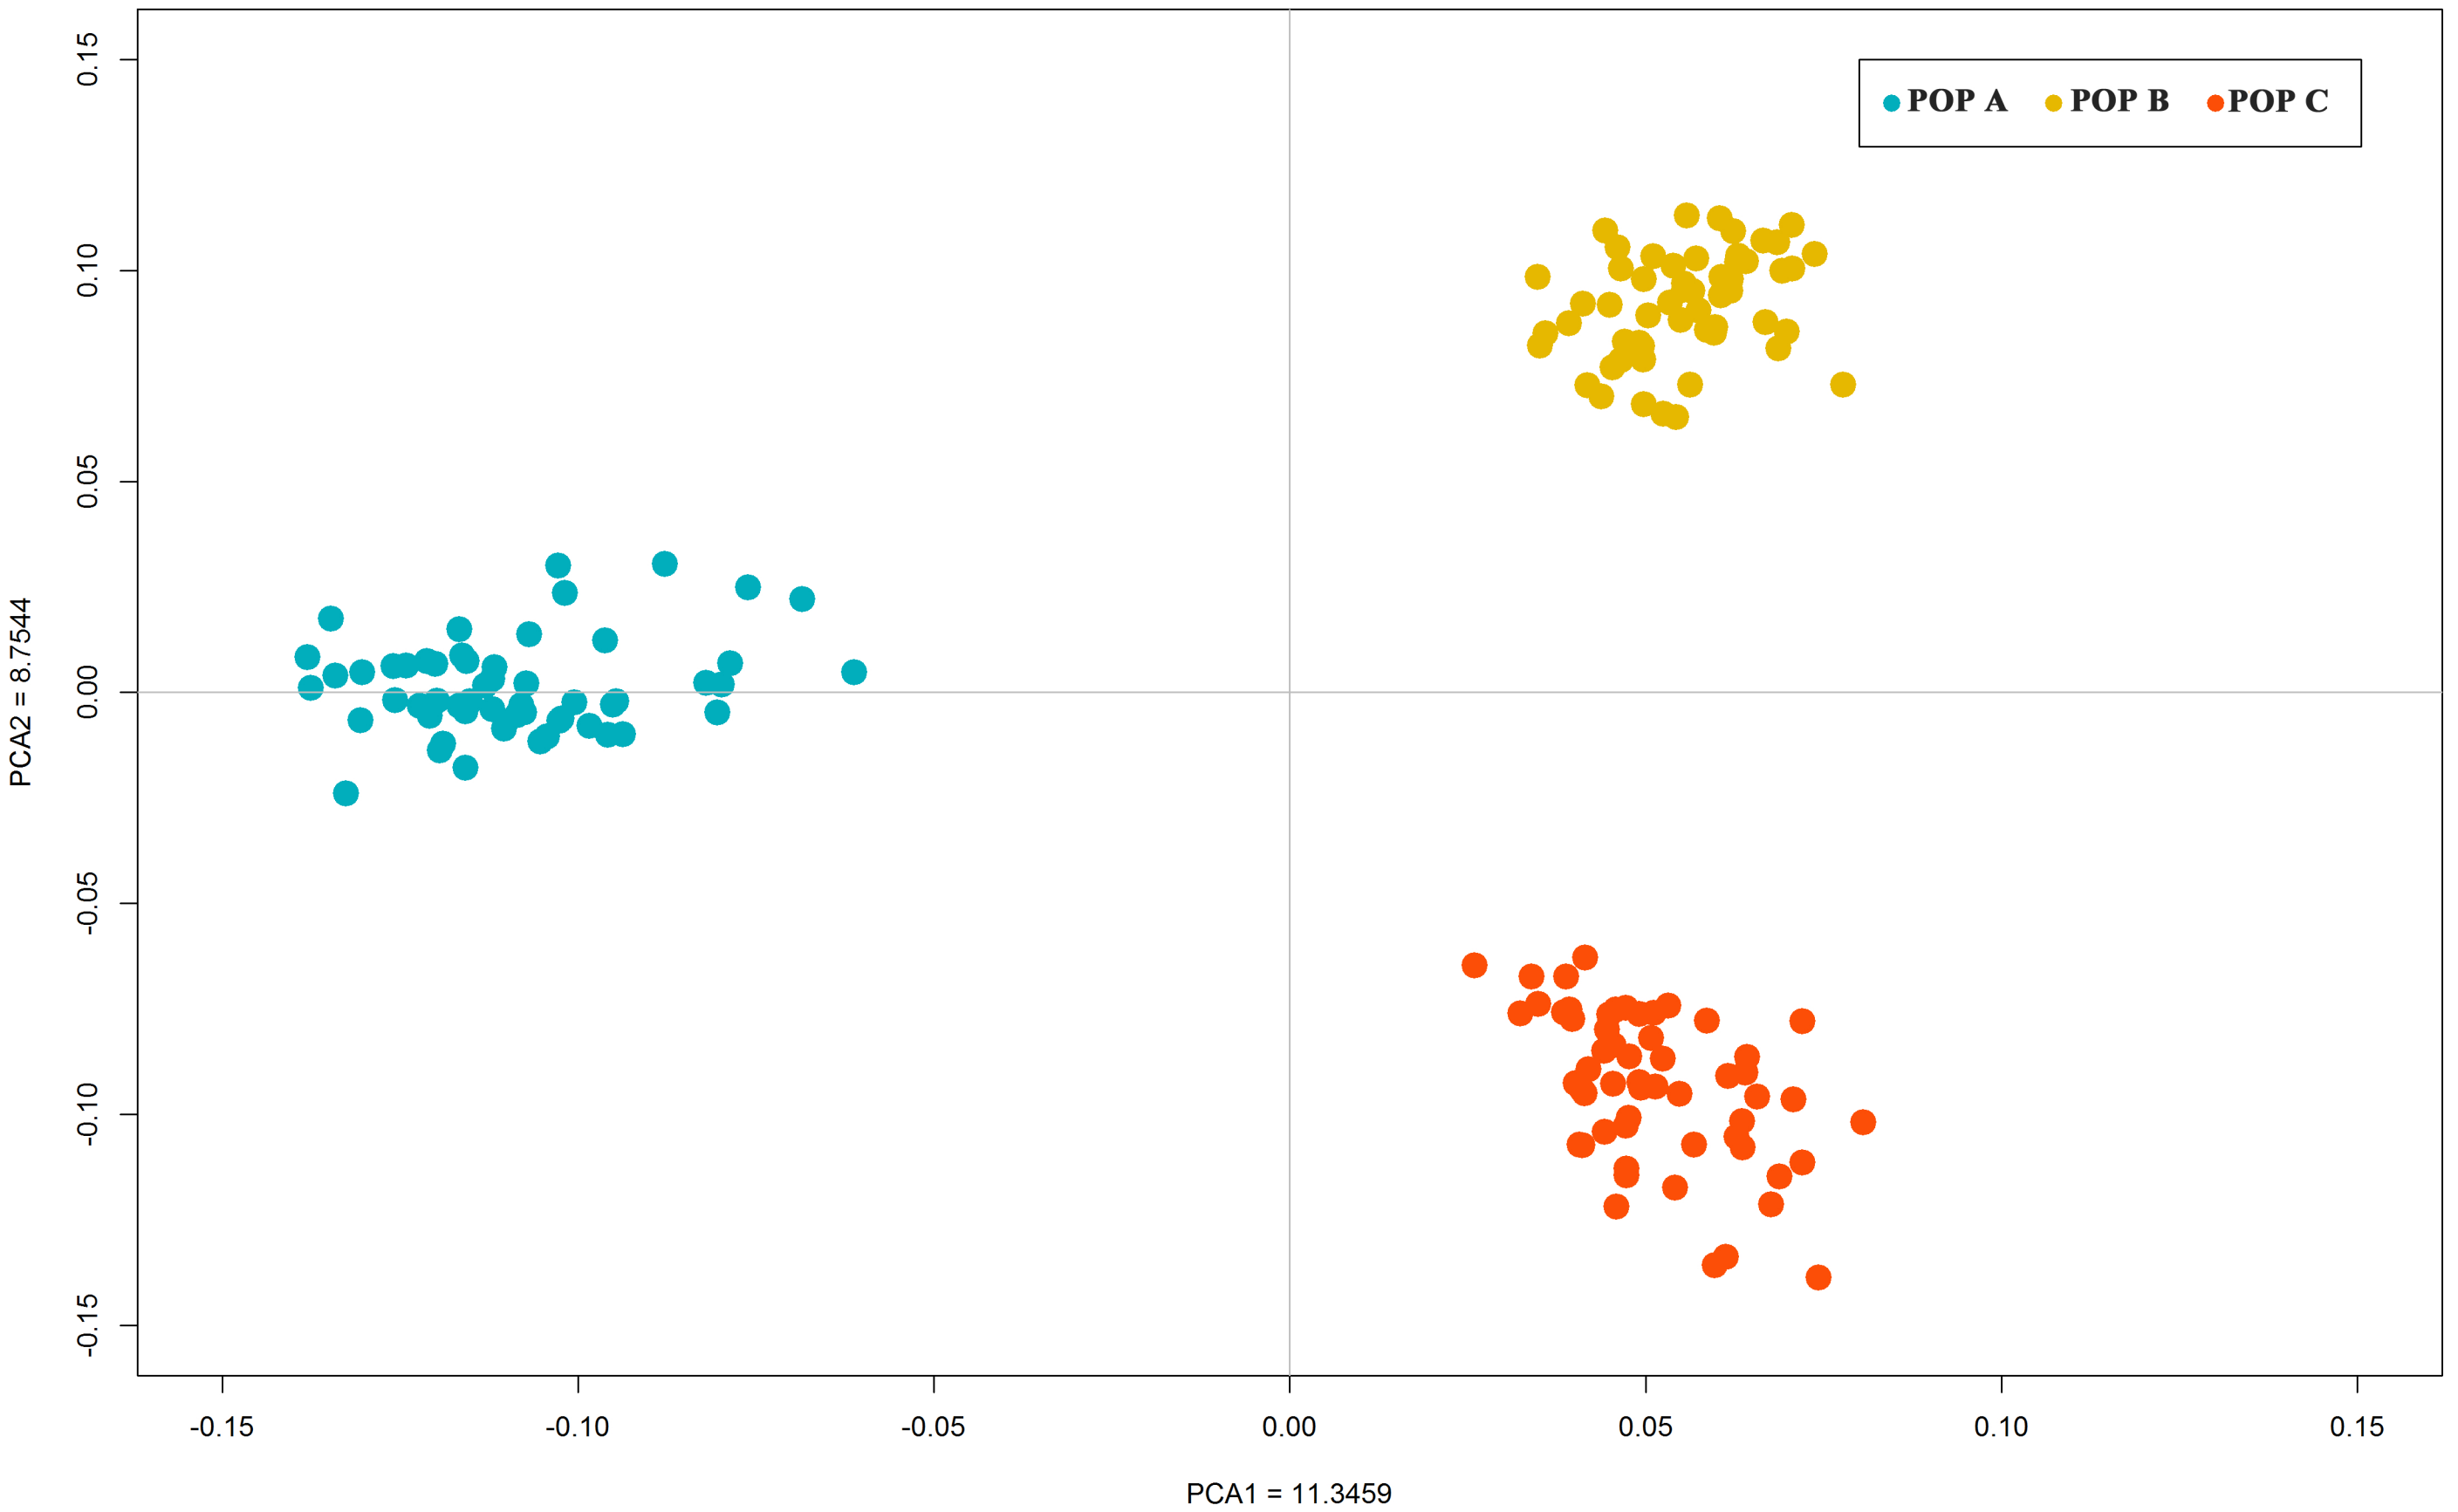

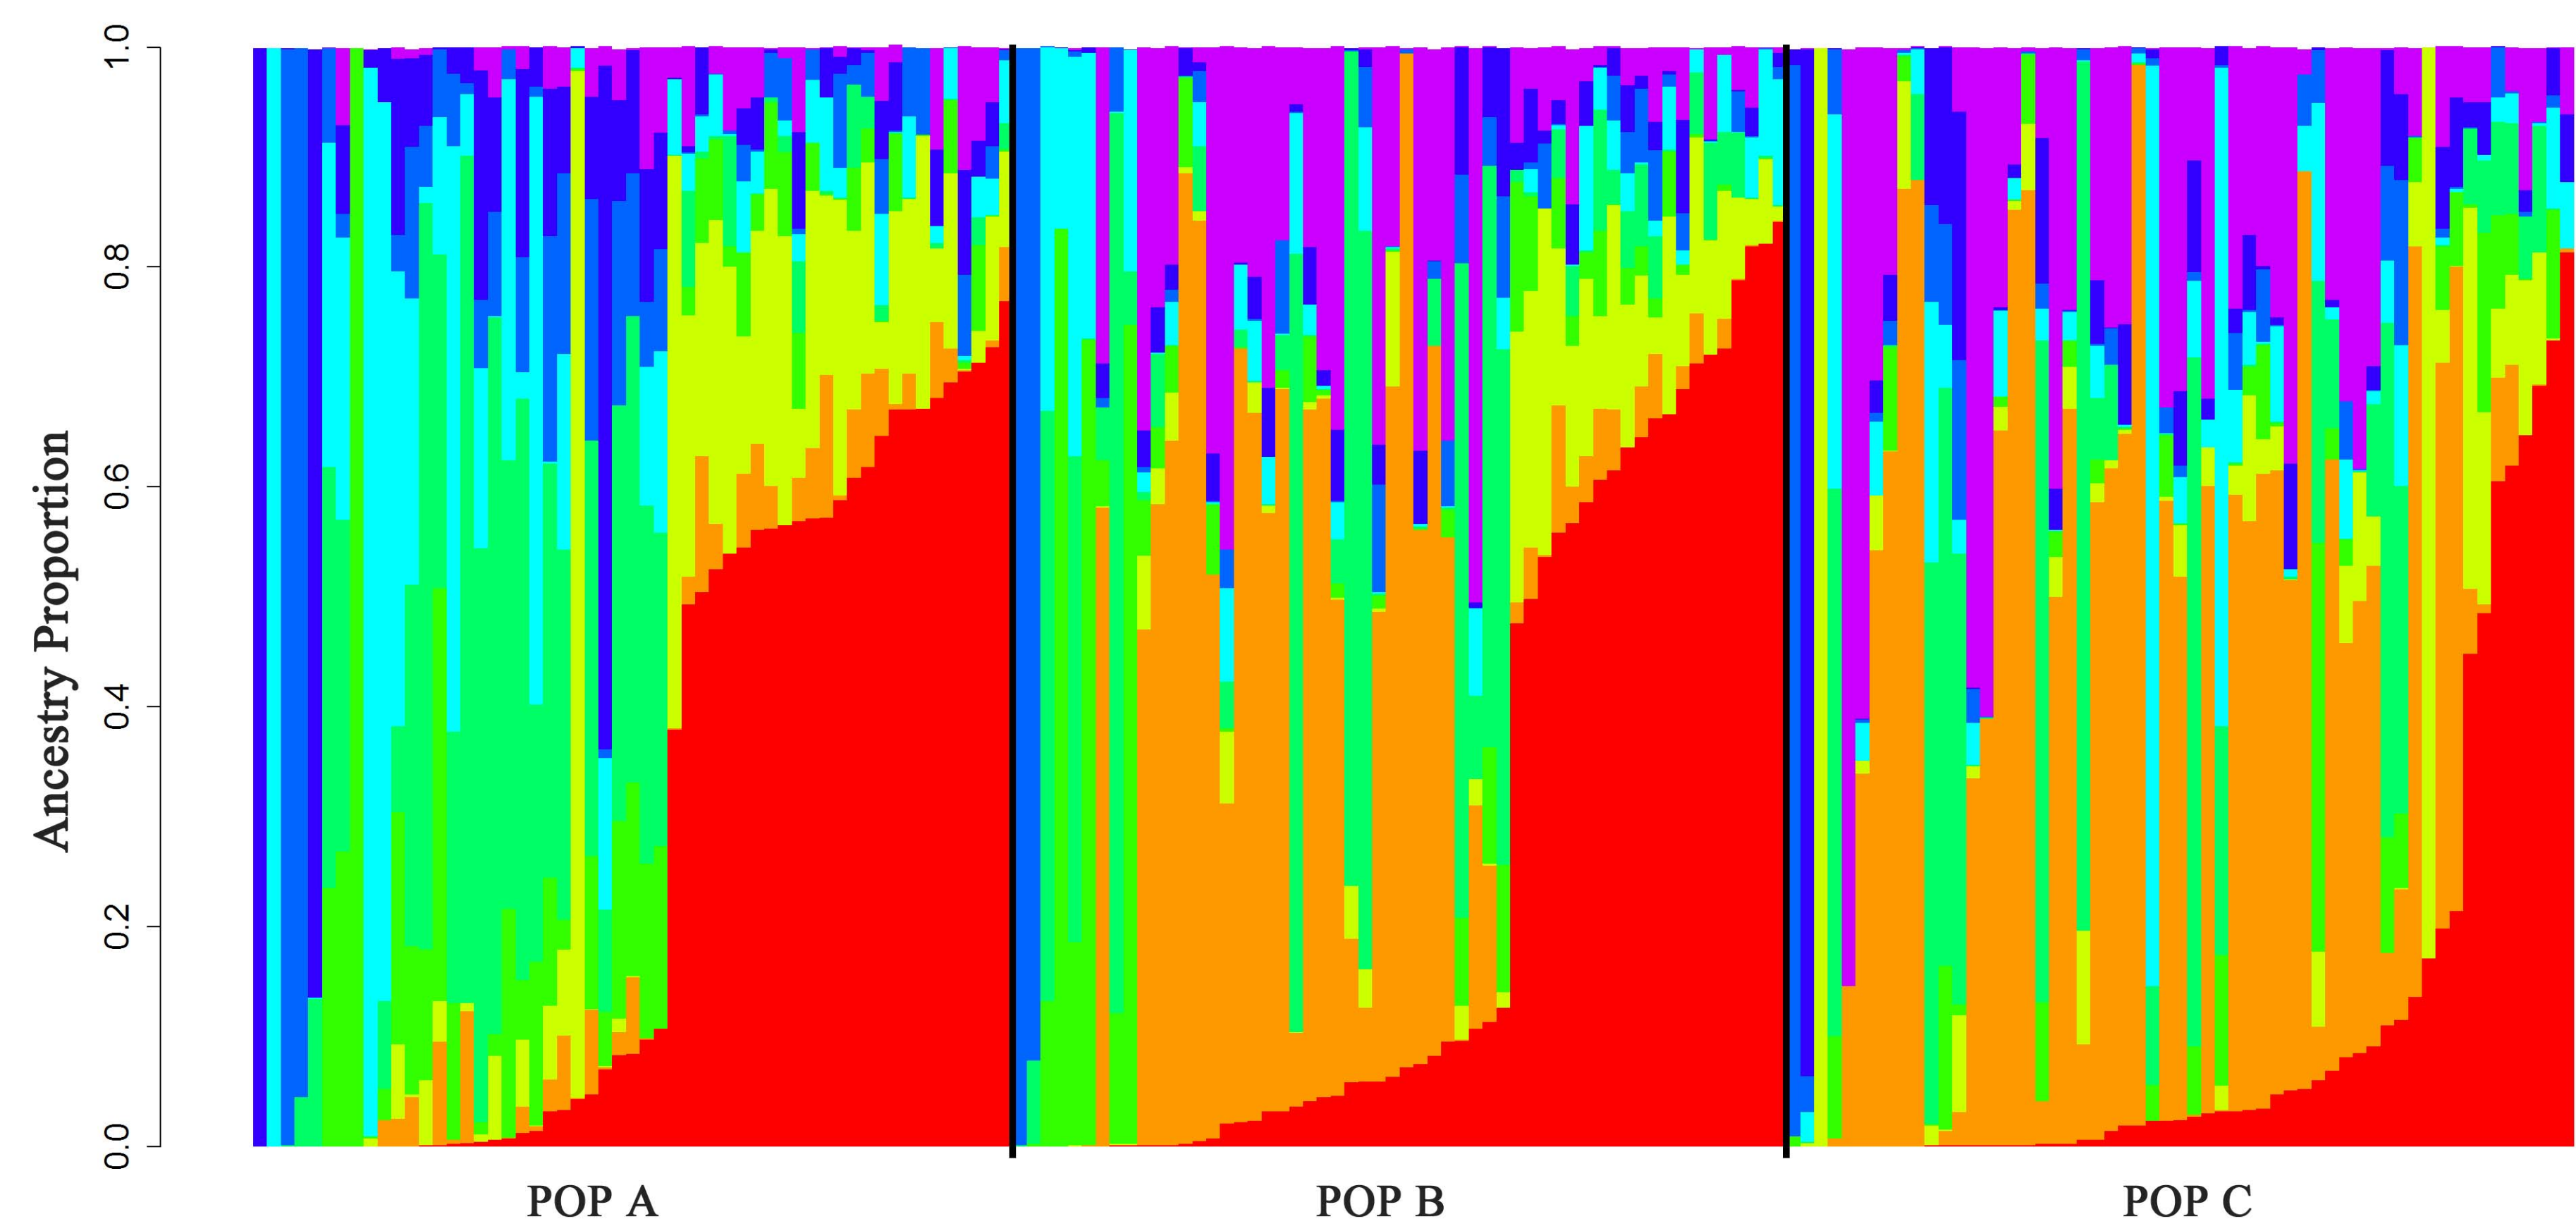

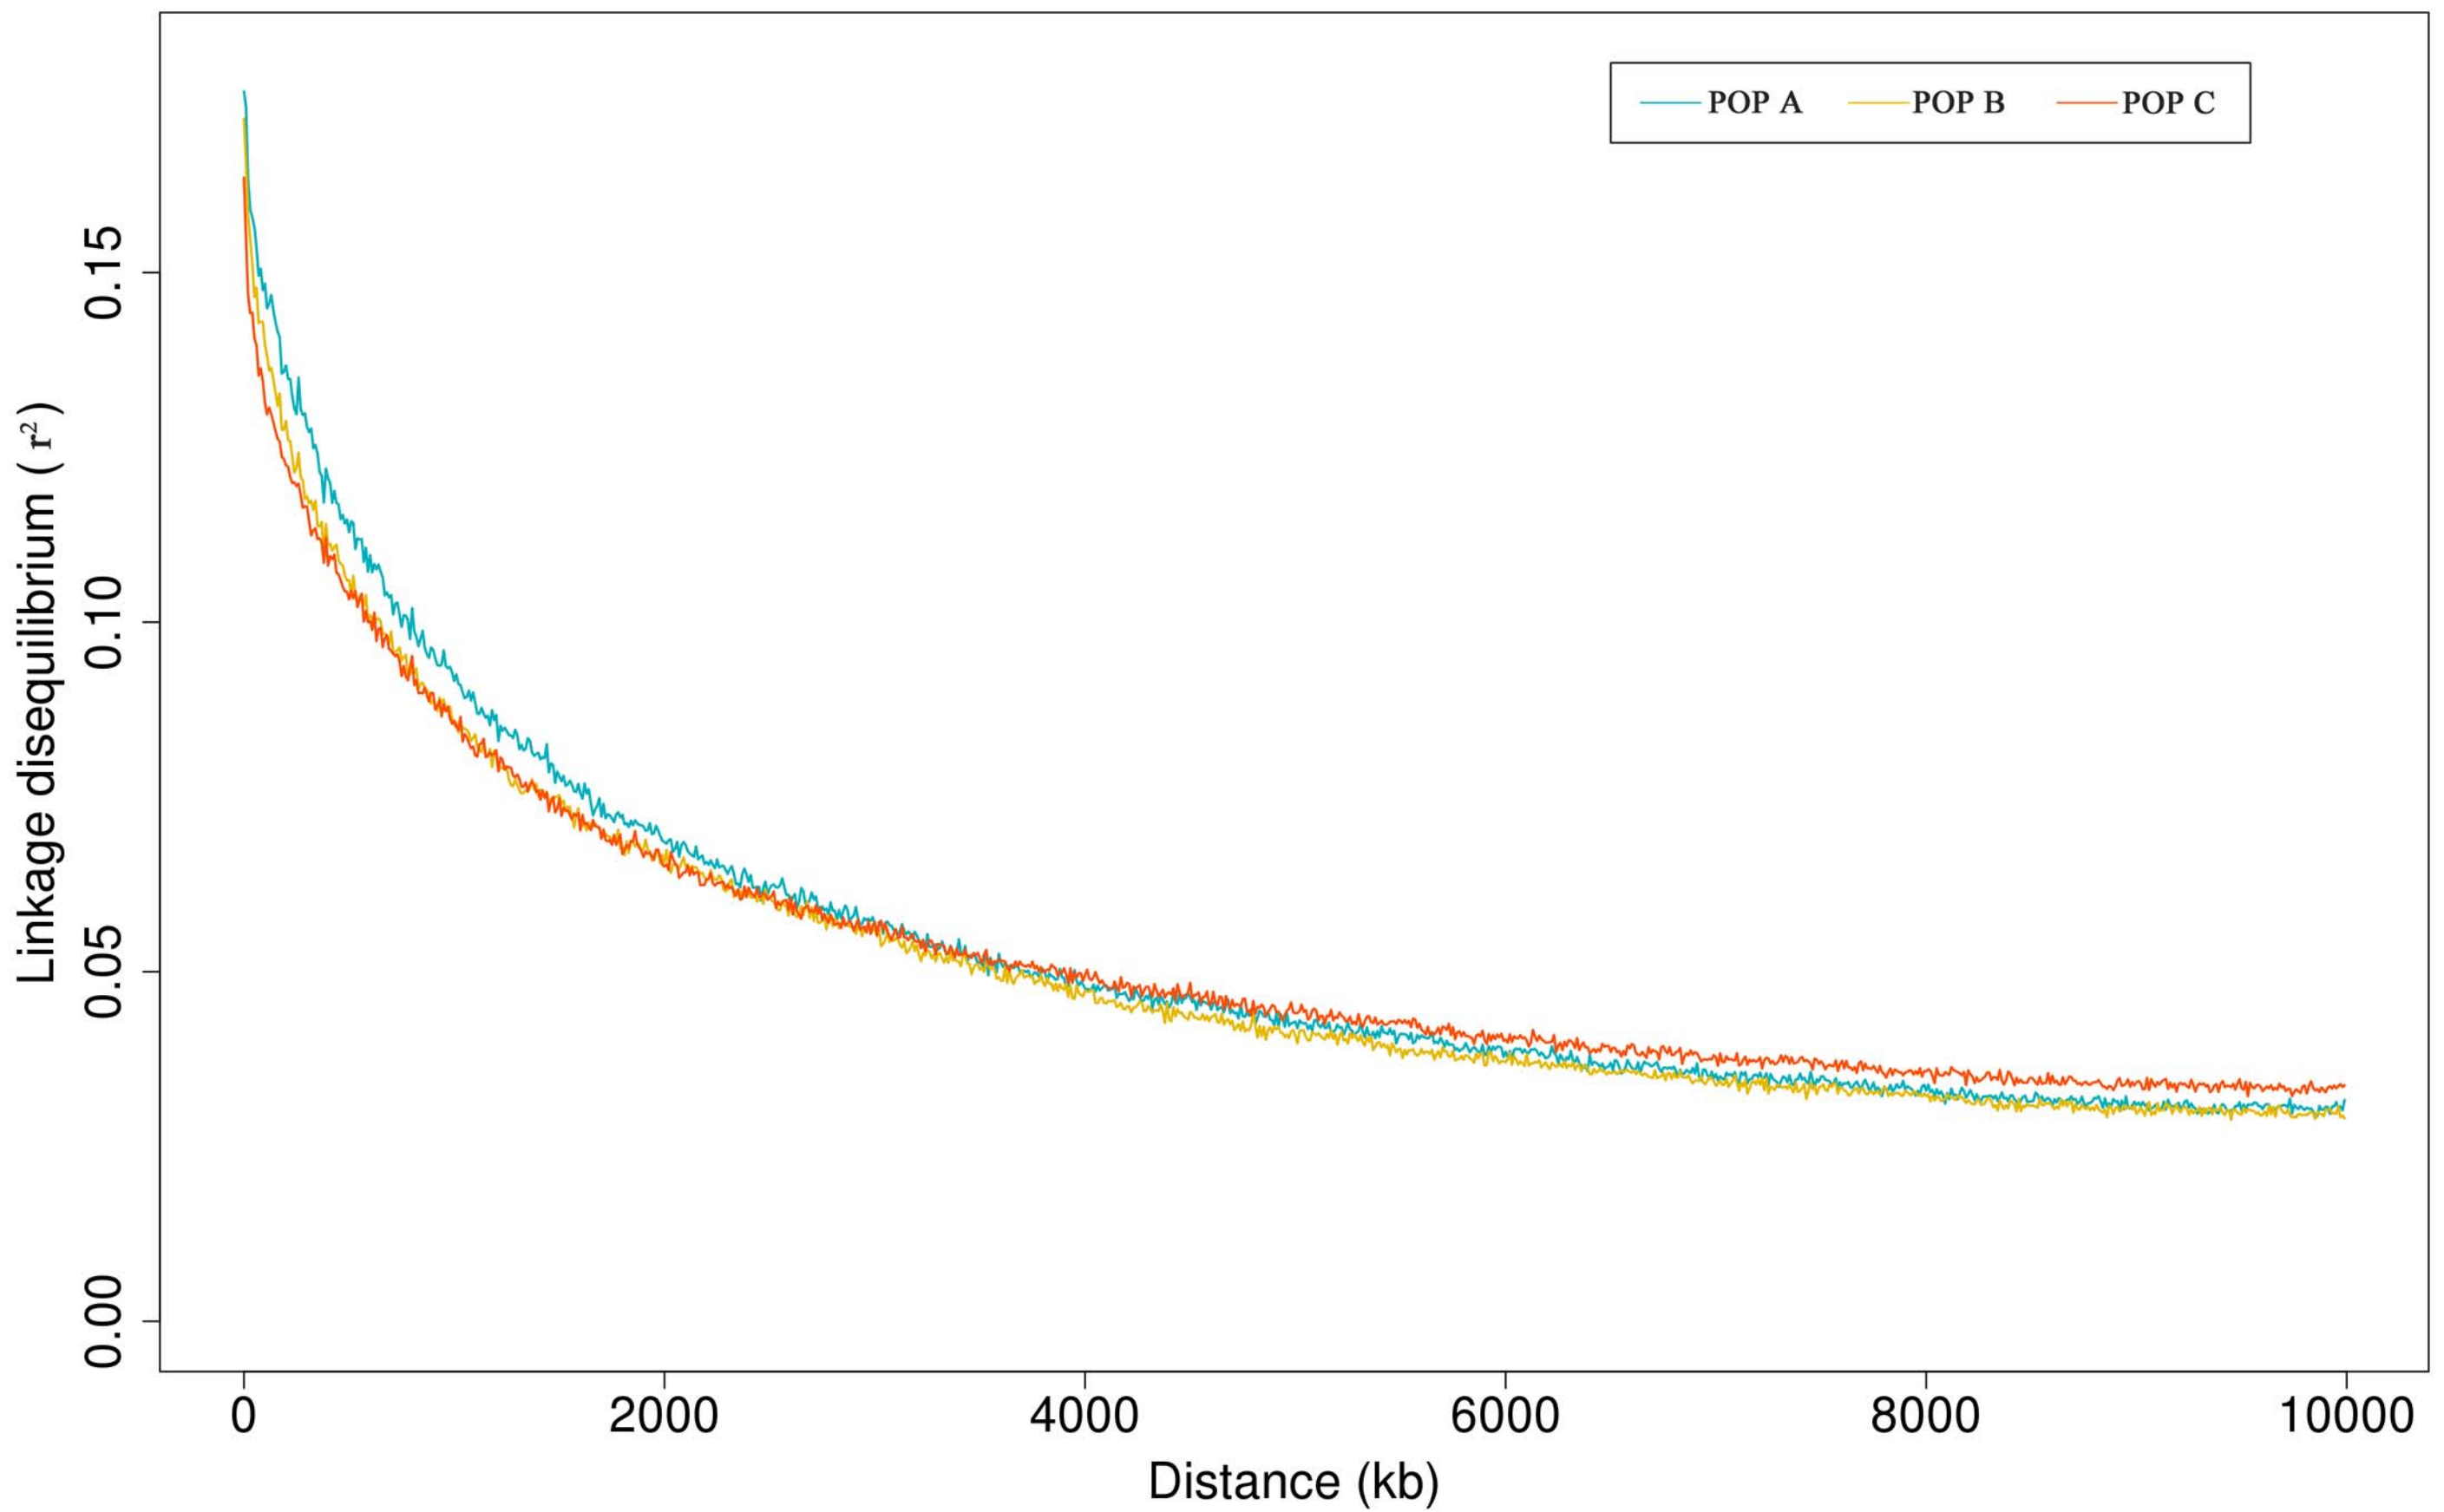

(A)

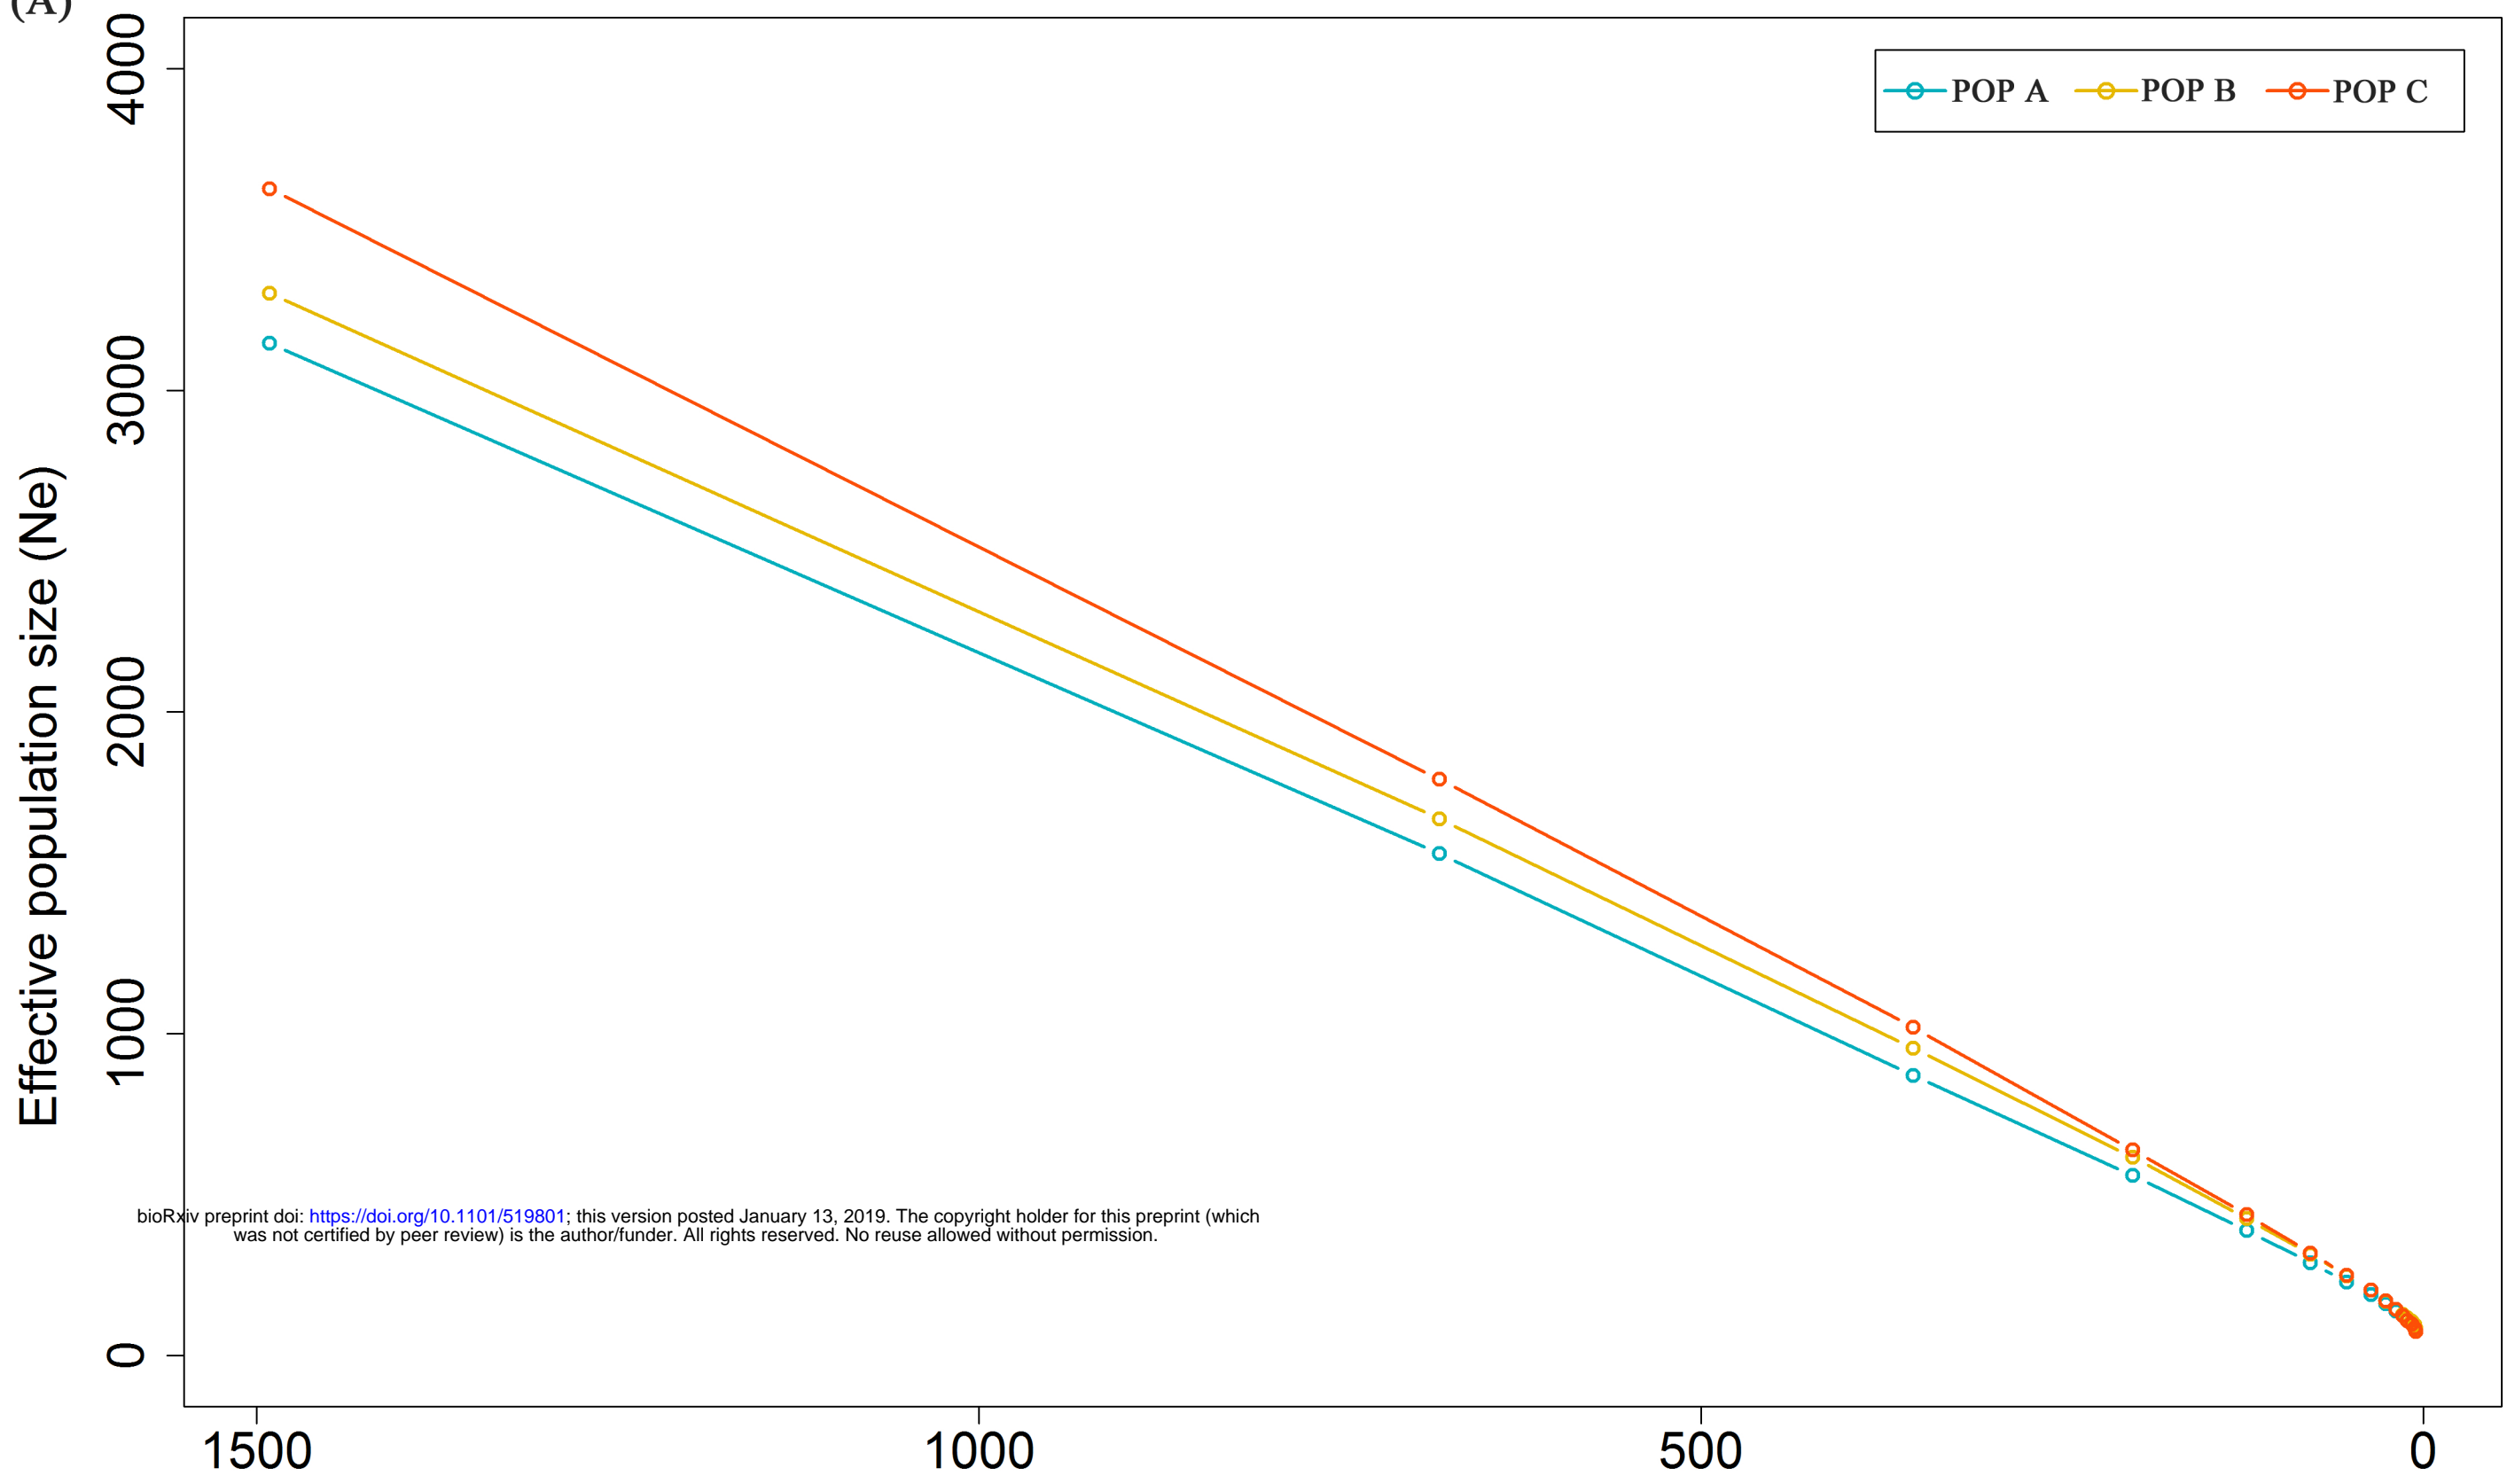

(B)

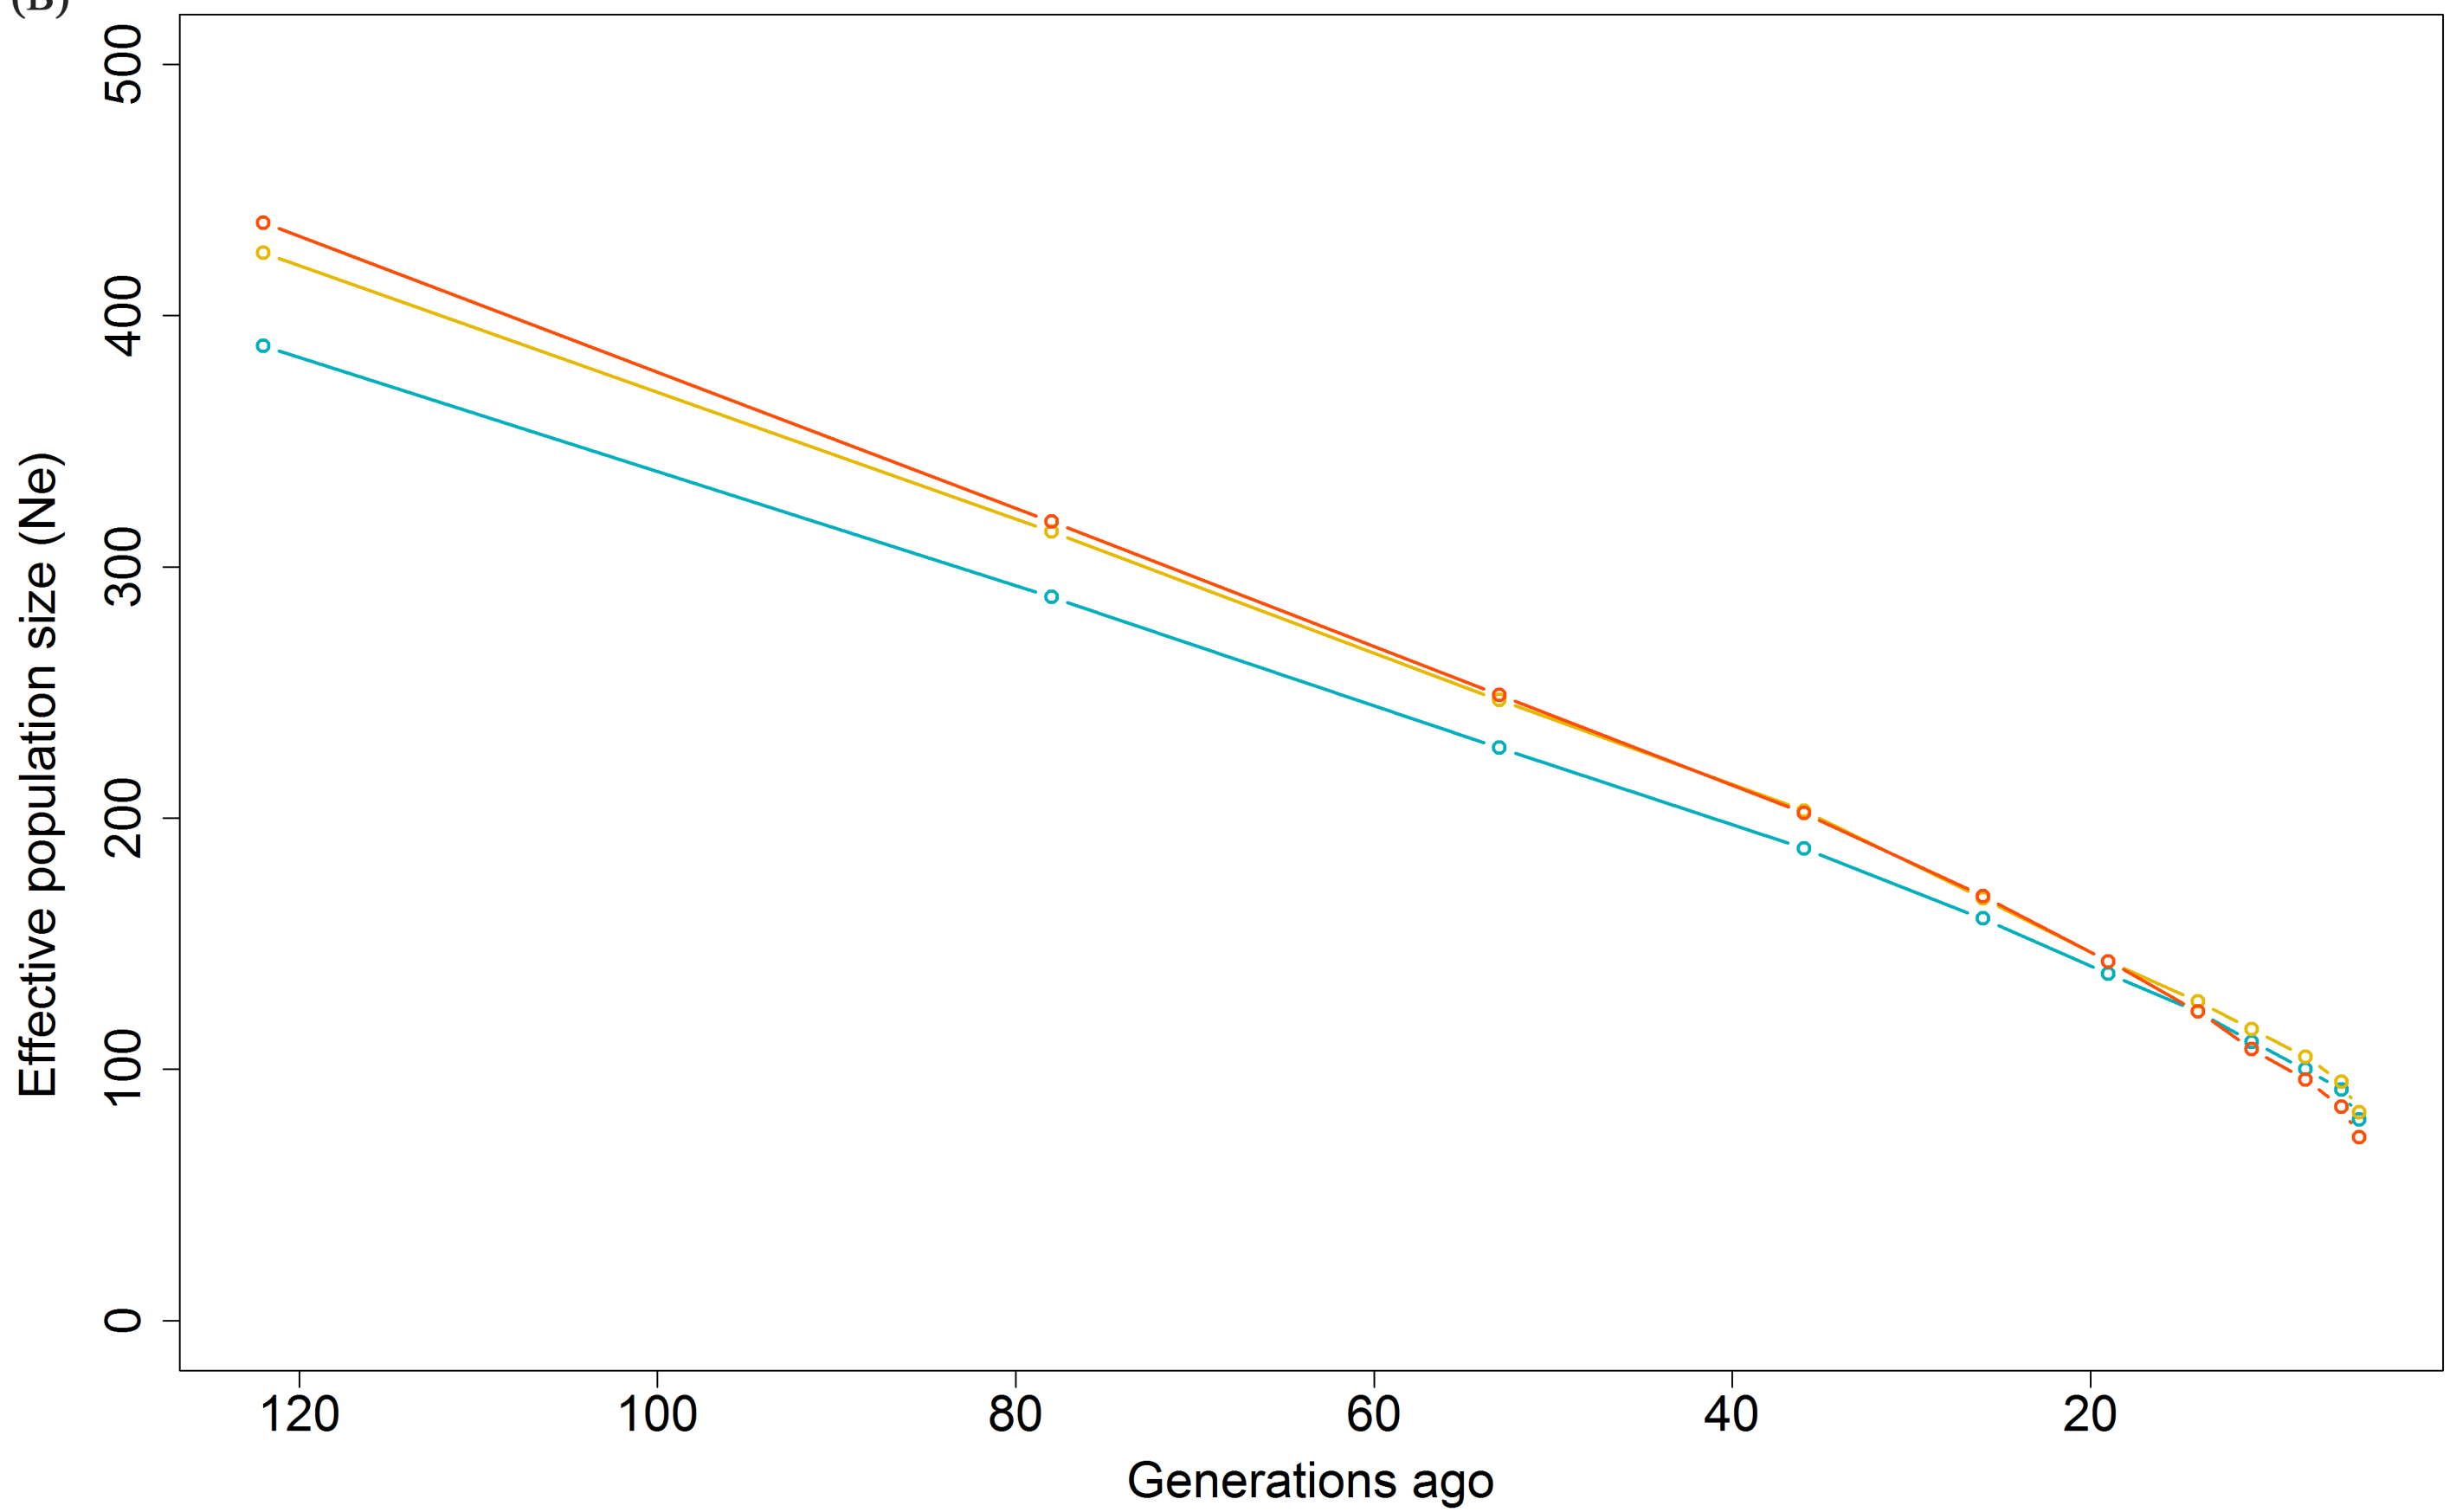

Source: https://www.biorxiv.org/content/10.1101/519801v1.full.pdf
